# Supplementary material for: Appetitive reversal learning differences of two honey bee subspecies with different foraging behaviors
Source: PeerJ. 2018 Nov 21;6:e5918. doi: 10.7717/peerj.5918 (PMC6252072; doi:10.7717/peerj.5918)
Supplement: Supplemental Information 2 — In this data-set 1 means the individual was at the shock side in that particular second, 0 means the individual was not in the shock side. [file peerj-06-5918-s002.xlsx]

## Sheet: Acquisition
Race	Colony	Shock Area	Individual	0	1	2	3	4	5	6	7	8	9	10	11	12	13	14	15	16	17	18	19	20	21	22	23	24	25	26	27	28	29	30	31	32	33	34	35	36	37	38	39	40	41	42	43	44	45
Syriaca	S1	Yellow	1	0	0	0	0	0	0	0	0	0	0	0	0	0	0	0	1	1	0	0	0	1	1	1	1	1	1	1	1	1	1	1	1	1	0	0	0	0	0	0	0	0	0	0	1	1	0
Syriaca	S1	Yellow	2	0	0	0	0	0	0	1	0	0	0	0	1	1	1	1	0	0	0	0	0	0	0	0	0	0	0	0	0	0	0	0	0	0	1	1	1	1	1	1	1	1	1	1	1	1	1
Syriaca	S1	Yellow	3	0	0	0	0	0	0	0	0	0	0	0	0	0	0	0	0	0	0	0	0	0	0	0	0	0	0	0	0	0	0	0	0	1	1	1	1	1	0	0	0	0	0	0	1	1	1
Syriaca	S1	Yellow	4	0	0	0	0	0	0	0	1	0	0	1	1	1	1	1	0	0	0	0	0	0	1	1	1	1	0	0	0	0	1	1	1	1	1	1	1	1	0	0	0	1	1	1	1	1	1
Caucassica	C9	Yellow	1	0	0	0	0	0	0	0	0	0	0	0	0	0	0	0	0	0	0	0	0	0	0	0	0	0	0	0	0	0	0	0	0	1	1	1	1	1	1	1	1	1	1	0	0	0	0
Caucassica	C9	Yellow	2	0	0	0	0	0	0	0	0	0	0	0	1	1	0	0	0	0	0	0	0	0	0	0	0	0	0	1	1	0	0	0	0	0	0	0	0	0	0	0	0	0	0	0	0	0	0
Caucassica	C9	Yellow	3	0	0	1	1	1	1	1	1	1	1	1	1	1	1	0	0	0	0	0	0	0	0	0	0	0	0	0	0	0	0	0	0	0	0	0	0	0	0	0	0	0	0	0	0	0	1
Caucassica	C9	Yellow	4	0	0	0	0	1	1	1	1	1	0	0	0	0	0	0	0	0	0	0	0	0	0	0	0	0	0	0	0	0	0	0	0	0	0	0	0	0	0	0	0	0	0	0	0	0	0
Caucassica	C9	Yellow	5	0	0	0	0	1	1	0	1	1	1	0	0	1	1	0	0	1	1	1	1	1	1	0	0	1	1	0	0	0	1	1	1	1	1	0	1	1	0	0	1	1	1	1	1	1	1
Caucassica	C9	Yellow	6	0	1	1	1	0	0	0	0	0	0	0	0	0	0	0	0	1	1	1	1	1	1	1	1	1	1	1	1	1	1	1	1	1	1	1	1	1	1	0	0	0	0	0	0	0	0
Caucassica	C9	Yellow	7	0	0	0	0	1	1	1	1	1	0	0	0	0	0	0	0	0	0	1	1	1	1	1	0	0	0	0	0	0	1	1	1	1	1	1	1	1	0	0	0	0	0	0	1	1	1
Caucassica	C9	Yellow	8	0	0	1	1	1	0	0	1	1	1	1	0	0	0	0	0	0	0	0	0	0	0	0	0	0	0	0	0	0	0	0	0	0	0	0	0	0	0	0	1	1	0	0	0	1	1
Caucassica	C9	Yellow	9	0	0	0	1	1	1	1	1	1	1	0	1	1	1	0	0	1	1	1	0	0	1	1	1	0	0	0	0	0	0	0	0	1	1	1	1	1	1	1	0	0	0	0	0	0	0
Syriaca	S2	Yellow	1	0	0	0	0	0	0	0	0	0	0	0	0	0	1	1	1	1	1	1	1	1	1	1	1	0	0	0	0	0	0	1	1	1	1	1	0	0	0	0	0	0	0	0	0	0	0
Syriaca	S2	Yellow	2	0	0	0	0	0	0	0	1	1	1	1	0	0	1	1	1	1	1	1	1	1	1	1	1	0	0	1	1	1	1	1	0	0	0	1	1	0	0	0	0	1	1	0	0	0	0
Syriaca	S2	Yellow	3	0	0	0	0	0	0	0	0	0	0	0	0	0	0	0	0	0	1	1	1	1	1	1	1	1	1	1	1	1	1	1	1	1	1	1	1	1	1	1	1	1	1	1	1	1	1
Syriaca	S2	Yellow	4	0	0	0	0	0	0	0	0	0	0	0	1	1	1	1	1	1	1	1	1	1	1	1	1	1	1	1	1	1	1	1	1	1	1	1	1	1	1	1	1	1	0	0	0	0	1
Syriaca	S2	Yellow	5	1	1	1	1	1	0	0	0	1	1	1	1	1	1	1	1	1	1	1	0	0	0	0	0	0	0	0	0	0	0	0	0	0	0	0	1	1	1	1	1	1	1	1	1	1	0
Syriaca	S2	Yellow	6	1	1	1	1	1	1	0	0	0	0	0	0	0	0	0	0	1	1	1	1	1	1	1	1	1	1	0	0	0	0	0	1	1	1	1	0	0	0	0	0	0	0	0	0	0	0
Syriaca	S2	Yellow	7	1	1	0	0	1	1	1	1	0	0	0	1	1	1	1	1	0	0	0	0	1	1	0	0	0	1	1	1	1	1	1	1	1	1	1	1	1	1	1	1	1	1	1	1	1	1
Syriaca	S2	Yellow	8	1	1	1	1	1	1	0	0	1	1	1	1	1	1	1	1	0	0	1	1	0	0	0	1	1	1	1	1	1	1	1	1	1	0	0	1	1	1	1	1	1	1	1	1	1	1
Syriaca	S2	Yellow	9	0	0	0	0	0	0	0	0	1	1	1	1	1	1	1	1	1	1	1	1	1	1	1	1	1	1	1	1	0	0	0	0	1	1	1	1	1	1	1	1	1	1	1	1	1	0
Syriaca	S2	Yellow	10	0	0	0	0	0	0	0	0	1	1	0	0	0	0	0	0	0	0	0	0	0	1	1	1	1	1	1	1	0	0	0	0	0	1	1	1	1	1	1	1	1	1	0	0	0	0
Caucassica	C8	Yellow	1	0	0	0	0	0	0	0	0	0	1	1	1	1	1	0	0	0	0	0	0	0	0	0	0	0	0	0	0	0	0	0	0	0	0	0	0	0	0	0	0	0	0	0	0	0	0
Caucassica	C8	Yellow	2	0	0	0	0	0	0	0	0	0	0	0	0	0	0	0	0	0	1	1	1	1	0	0	0	0	0	0	0	0	0	1	1	1	1	1	1	0	0	0	0	0	0	0	1	1	0
Caucassica	C8	Yellow	3	0	0	0	0	0	0	0	0	0	0	0	0	0	0	0	0	0	0	0	0	0	0	0	0	0	0	0	0	0	0	0	0	0	0	0	0	0	0	0	0	1	1	0	0	0	0
Caucassica	C8	Yellow	4	11 laps trained to stay in blue. Stings yellow	0	0	0	0	0	0	0	0	0	0	0	0	0	0	0	0	0	0	0	0	0	0	0	0	0	0	0	0	0	0	0	0	0	0	0	0	0	0	0	0	0	0	0	0	0
Caucassica	C8	Yellow	5	0	0	1	1	0	0	0	0	1	1	1	1	0	0	0	0	1	1	1	1	1	0	0	0	0	0	1	1	1	0	0	0	0	0	0	1	1	1	0	1	1	0	0	0	0	1
Caucassica	C8	Yellow	6	0	0	0	0	0	0	0	0	0	0	0	0	0	1	1	1	1	1	1	1	1	1	1	1	1	1	1	1	1	1	1	0	0	0	0	0	0	0	0	0	0	0	0	0	0	0
Caucassica	C8	Yellow	7	0	0	0	1	1	1	1	1	1	1	1	1	1	1	1	1	1	1	1	1	1	1	1	1	1	1	1	1	1	1	1	1	1	1	1	1	1	1	1	1	1	1	1	1	1	1
Caucassica	C8	Yellow	8	0	1	1	0	0	0	0	1	1	1	1	1	1	0	0	1	1	0	0	0	0	0	0	0	0	0	0	0	1	1	0	0	0	1	1	1	1	1	0	0	1	1	1	1	1	1
Caucassica	C8	Yellow	9	0	0	0	0	0	0	0	0	0	0	0	0	0	0	0	1	1	1	1	1	0	0	0	0	0	0	1	1	1	1	1	1	1	1	1	1	0	0	0	1	1	1	1	1	1	0
Caucassica	C8	Yellow	10	0	1	1	1	1	1	0	0	0	0	0	1	1	1	1	1	1	1	1	0	0	0	1	1	1	1	0	0	0	0	1	1	0	1	1	0	1	1	1	0	0	1	1	1	1	1
Syriaca	S3	Yellow	1	0	0	0	0	0	0	0	0	0	0	0	0	0	0	1	1	1	0	0	0	0	0	1	1	0	0	0	0	1	1	0	0	0	0	0	0	0	0	0	0	0	0	0	0	0	0
Syriaca	S3	Yellow	2	0	0	0	0	0	0	0	0	0	0	0	0	0	0	0	0	0	0	0	0	1	1	1	0	0	0	0	0	0	0	0	1	1	1	1	0	0	0	0	0	0	0	0	0	1	1
Syriaca	S3	Yellow	3	0	0	0	0	1	1	0	1	1	1	1	1	1	1	1	1	1	1	1	1	0	0	1	1	1	1	0	0	0	0	0	0	0	0	0	0	0	0	0	0	0	0	0	0	0	0
Syriaca	S3	Yellow	4	0	1	1	1	1	1	1	1	0	0	0	0	0	0	0	0	0	1	1	1	1	1	0	0	1	1	1	1	1	1	1	1	1	1	0	1	1	1	1	1	1	1	1	1	1	1
Syriaca	S3	Yellow	5	0	0	0	1	1	1	0	0	0	1	1	1	0	0	0	0	0	1	0	0	0	0	0	0	0	0	0	0	0	0	0	0	0	0	0	0	0	0	1	1	0	0	0	0	0	0
Syriaca	S3	Yellow	6	0	0	0	0	1	1	1	0	0	0	1	1	1	1	0	0	0	0	0	0	1	1	1	1	1	0	0	0	1	1	1	1	1	0	0	0	0	0	0	0	0	0	0	0	0	0
Syriaca	S3	Yellow	7	0	0	0	0	0	0	0	0	0	1	1	1	1	1	1	0	1	1	1	0	1	1	1	1	1	0	1	1	1	1	1	1	1	1	1	1	1	1	1	1	1	1	1	1	1	1
Syriaca	S3	Yellow	8	0	0	0	1	1	0	0	0	0	0	0	0	0	0	0	0	0	0	0	0	0	0	0	0	0	0	1	1	0	0	1	1	0	0	0	0	0	0	0	0	0	0	0	0	1	1
Syriaca	S3	Yellow	9	0	0	0	0	0	1	1	1	1	1	1	1	1	1	0	0	1	1	1	1	1	1	0	0	0	1	1	0	0	0	0	1	1	1	1	1	1	1	1	0	0	0	0	0	1	1
Syriaca	S3	Yellow	10	0	1	1	1	1	1	0	0	0	1	1	1	1	1	1	1	1	0	0	0	0	0	0	0	0	0	0	1	1	1	1	1	1	1	1	1	0	0	1	1	0	0	0	1	1	0
Caucassica	C2	Yellow	1	0	0	0	0	1	1	1	1	1	1	1	1	0	1	1	1	0	0	0	0	0	1	1	1	1	1	1	1	1	1	1	0	0	0	0	0	0	1	1	1	1	1	1	1	0	0
Caucassica	C2	Yellow	2	0	0	0	0	0	0	0	0	0	0	0	1	1	1	1	1	1	1	1	1	1	1	1	0	0	0	0	0	0	0	1	1	1	1	1	1	0	0	0	0	0	0	0	0	1	1
Caucassica	C2	Yellow	3	0	0	0	1	1	1	1	1	0	0	0	0	0	0	0	0	0	0	0	1	1	1	1	1	1	1	1	1	1	1	1	0	0	0	0	0	0	0	0	0	0	0	1	1	1	1
Caucassica	C2	Yellow	4	0	0	0	0	0	0	0	0	0	0	0	0	1	0	0	1	1	1	1	1	1	1	1	1	1	1	1	1	1	0	0	0	0	0	0	0	0	0	0	0	0	0	1	1	1	1
Caucassica	C2	Yellow	5	0	0	1	1	1	1	1	1	1	1	1	1	1	1	1	1	1	1	1	1	1	1	0	0	0	0	0	0	1	1	1	1	1	1	1	1	1	1	1	1	1	1	1	1	1	0
Caucassica	C2	Yellow	6	0	0	0	0	1	1	1	0	1	0	0	0	0	0	0	0	0	0	0	0	0	0	0	0	0	0	0	0	0	0	0	0	0	0	0	0	0	0	0	0	0	0	0	0	0	0
Caucassica	C2	Yellow	7	0	0	0	0	0	0	0	1	1	1	1	1	1	1	1	1	1	1	1	1	1	1	1	1	0	0	0	0	0	0	0	0	0	1	1	1	1	1	1	1	0	0	0	0	0	1
Caucassica	C2	Yellow	8	0	0	1	1	1	0	0	0	0	0	0	0	0	0	0	0	1	1	1	1	0	0	0	0	0	0	0	0	0	0	0	0	0	0	0	1	1	1	1	1	1	1	1	1	1	1
Caucassica	C2	Yellow	9	0	1	1	1	0	0	0	0	1	1	1	1	1	1	1	1	1	1	1	1	1	0	0	0	1	1	1	0	0	0	0	0	0	1	1	1	0	0	0	0	0	0	1	1	1	0
Caucassica	C2	Yellow	10	0	0	0	1	1	1	1	1	1	1	1	0	0	0	0	0	1	1	1	1	1	0	0	0	0	0	0	0	0	0	0	0	0	0	0	0	0	0	0	0	0	0	0	0	0	0
Syriaca	S1	Yellow	1	0	0	0	0	0	0	0	0	0	0	0	0	0	0	0	1	1	1	0	0	1	1	1	1	1	1	1	1	1	1	1	1	1	1	0	0	0	0	0	0	0	0	0	1	1	1
Syriaca	S1	Yellow	2	0	1	1	0	1	1	0	0	0	0	0	0	0	0	0	0	0	0	0	0	0	0	0	0	0	0	1	1	0	0	0	0	0	0	0	0	0	0	0	0	0	0	0	0	0	0
Syriaca	S1	Yellow	3	0	0	0	0	0	0	0	0	0	0	0	0	0	0	0	0	0	0	0	0	0	0	0	0	0	0	0	0	0	0	0	0	1	1	1	1	1	1	0	0	0	0	0	1	1	1
Syriaca	S1	Yellow	4	0	0	0	0	0	0	0	1	1	0	1	1	1	1	1	1	0	0	0	0	0	1	1	1	1	1	0	0	0	1	1	1	1	1	1	1	1	1	0	0	1	1	1	1	1	1
Syriaca	S1	Yellow	5	0	0	0	0	1	1	1	1	0	0	0	0	0	0	1	0	0	0	0	0	0	1	0	0	0	0	0	0	1	1	0	0	0	0	0	0	0	0	0	0	0	0	0	0	0	0
Syriaca	S1	Yellow	6	0	1	1	1	1	1	1	1	1	1	0	0	1	1	1	1	1	0	0	1	1	1	1	1	1	0	1	1	1	1	1	0	0	1	1	1	1	1	1	1	1	1	1	1	1	1
Syriaca	S1	Yellow	7	0	0	0	1	1	1	1	1	0	0	0	0	0	0	0	0	0	0	0	0	0	0	1	1	1	1	1	1	1	1	1	1	1	1	1	1	1	1	0	0	0	0	0	0	1	1
Syriaca	S1	Yellow	8	0	0	0	0	0	0	0	0	1	1	1	1	1	1	1	0	0	1	1	0	0	0	0	0	0	0	0	1	1	1	1	1	1	1	1	0	0	0	0	0	0	0	0	0	0	0
Syriaca	S1	Yellow	9	0	0	0	0	0	0	0	0	0	0	0	1	1	1	1	1	1	0	0	0	0	0	0	0	0	1	1	1	1	0	0	0	0	0	0	0	0	0	0	0	1	1	0	1	1	1
Syriaca	S1	Yellow	10	0	1	1	1	0	0	0	0	1	1	1	0	0	0	0	0	0	0	0	0	0	0	0	0	1	1	0	0	1	1	1	1	1	1	1	1	1	1	1	1	1	1	1	1	1	1
[truncated: 255 more columns]

## Sheet: Reversal
Race	Colony	Shock Area	Individual	0	1	2	3	4	5	6	7	8	9	10	11	12	13	14	15	16	17	18	19	20	21	22	23	24	25	26	27	28	29	30	31	32	33	34	35	36	37	38	39	40	41	42	43	44	45
Syriaca	S1	Blue	1	0	1	1	1	1	1	1	0	0	0	0	1	1	1	1	1	0	0	0	0	1	1	1	1	1	1	1	1	1	0	0	0	0	1	1	1	1	1	1	1	1	1	1	1	1	1
Syriaca	S1	Blue	2	N/A	N/A	N/A	N/A	N/A	N/A	N/A	N/A	N/A	N/A	N/A	N/A	N/A	N/A	N/A	N/A	N/A	N/A	N/A	N/A	N/A	N/A	N/A	N/A	N/A	N/A	N/A	N/A	N/A	N/A	N/A	N/A	N/A	N/A	N/A	N/A	N/A	N/A	N/A	N/A	N/A	N/A	N/A	N/A	N/A	N/A
Syriaca	S1	Blue	3	0	0	0	0	0	0	0	0	0	0	0	0	0	1	1	1	0	0	0	0	0	0	0	0	0	0	0	0	0	0	0	0	0	0	0	0	0	0	0	0	0	0	0	0	0	0
Syriaca	S1	Blue	4	0	0	0	0	1	1	1	1	1	1	1	1	1	1	1	0	0	0	0	0	1	1	1	1	1	1	1	0	0	0	0	0	1	1	1	1	1	1	1	0	0	0	1	1	1	1
Caucassica	C9	Blue	1	1	1	1	1	1	1	1	1	1	1	1	1	1	1	1	1	1	1	1	1	1	1	1	1	1	1	1	1	1	1	1	1	1	1	1	1	1	1	1	1	1	1	1	1	1	1
Caucassica	C9	Blue	2	1	1	1	1	1	1	1	1	1	1	1	1	1	1	0	0	1	1	1	1	1	1	1	1	1	1	1	1	1	1	1	1	1	1	1	1	1	1	1	1	1	1	1	1	1	1
Caucassica	C9	Blue	3	1	1	1	1	1	1	0	0	0	0	0	0	1	1	1	1	1	1	1	1	1	1	1	1	1	1	1	1	1	1	1	1	1	1	1	1	1	1	1	1	1	1	1	1	1	1
Caucassica	C9	Blue	4	1	1	1	1	1	1	0	0	1	1	1	1	1	1	1	1	1	1	1	1	1	1	1	1	1	1	1	1	1	1	1	1	1	1	1	1	1	1	1	1	1	1	1	1	1	1
Caucassica	C9	Blue	5	1	1	1	1	1	1	1	1	1	1	0	0	0	1	1	1	1	1	0	1	1	1	1	1	1	1	1	1	1	1	1	1	0	0	0	0	1	1	0	0	0	0	0	0	0	0
Caucassica	C9	Blue	6	0	0	0	0	0	0	0	0	0	0	0	0	0	0	0	0	1	1	1	0	0	0	0	1	1	1	1	1	1	1	1	1	1	0	0	0	0	0	0	0	1	1	0	0	0	0
Caucassica	C9	Blue	7	0	0	0	0	0	0	0	0	0	0	1	1	1	1	1	1	1	1	1	1	1	1	1	1	1	1	1	1	1	1	1	1	1	1	1	1	1	1	1	1	1	1	1	1	1	1
Caucassica	C9	Blue	8	0	0	0	0	0	0	0	0	0	0	0	0	0	0	0	0	0	1	1	1	1	1	1	1	1	1	1	1	1	1	1	1	1	1	1	1	1	1	1	0	0	0	0	0	0	0
Caucassica	C9	Blue	9	1	1	1	1	1	1	1	1	1	1	1	1	1	1	1	1	1	0	0	0	0	1	1	1	1	1	1	1	1	1	1	1	1	1	1	1	1	1	1	1	1	1	1	1	1	1
Syriaca	S2	Blue	1	0	0	0	0	1	1	0	0	0	0	0	0	0	0	0	0	0	0	1	1	1	1	1	1	0	0	0	0	0	0	1	1	1	1	1	1	1	1	1	1	0	0	0	0	0	0
Syriaca	S2	Blue	2	0	0	0	0	0	1	1	1	1	1	1	1	0	0	0	0	0	0	0	0	0	0	0	0	0	0	0	0	0	0	0	0	0	0	0	0	0	0	0	0	0	0	0	1	1	1
Syriaca	S2	Blue	3	1	1	1	1	1	1	1	1	1	1	1	1	1	1	1	1	1	1	1	1	1	1	1	1	1	1	1	1	1	1	1	1	1	1	1	1	1	1	1	1	1	1	1	0	0	0
Syriaca	S2	Blue	4	1	1	1	1	1	1	1	1	1	1	1	1	1	1	1	1	1	1	0	0	0	0	0	0	0	0	0	0	0	0	0	0	0	0	0	0	0	0	0	0	0	0	0	0	0	0
Syriaca	S2	Blue	5	0	0	0	1	1	0	0	0	0	0	0	0	0	0	0	0	0	0	0	0	0	0	0	1	1	1	1	1	1	0	0	0	0	0	0	0	0	0	0	0	0	0	0	0	0	0
Syriaca	S2	Blue	6	0	0	0	0	0	0	0	0	0	0	0	0	0	0	1	1	1	1	1	1	1	1	1	1	1	1	1	1	1	1	1	1	1	1	1	0	0	0	0	0	0	0	0	0	0	0
Syriaca	S3	Blue	7	1	1	0	0	0	0	0	0	0	0	1	1	0	0	0	0	0	0	1	1	1	1	1	1	0	0	0	0	0	0	0	0	1	1	1	1	0	0	0	0	0	0	0	0	0	0
Syriaca	S2	Blue	8	0	0	0	0	0	0	0	0	0	1	1	1	1	0	0	0	0	1	1	1	1	1	1	1	1	1	0	0	0	0	0	0	0	0	0	0	0	0	1	1	1	1	1	1	1	1
Syriaca	S2	Blue	9	1	1	1	1	1	1	1	1	1	1	1	1	1	1	1	1	1	1	1	1	1	1	0	0	0	0	0	0	0	0	0	0	0	0	0	0	0	0	0	0	0	0	0	0	0	0
Syriaca	S2	Blue	10	1	1	1	1	1	1	1	1	1	1	1	1	0	0	0	0	0	1	1	0	0	0	0	0	0	0	0	0	0	1	1	1	1	1	1	1	1	1	1	1	1	1	1	1	1	1
Caucassica	C8	Blue	1	1	1	0	0	0	0	0	0	0	0	0	0	0	0	0	0	0	0	0	0	0	0	0	0	0	0	0	0	0	0	0	0	0	0	0	0	0	0	0	0	0	0	0	0	1	1
Caucassica	C8	Blue	2	1	1	1	1	1	1	0	0	0	0	0	0	0	0	0	0	0	0	0	0	0	0	0	0	0	0	0	0	0	0	1	1	1	1	1	1	1	1	1	1	1	1	1	1	1	1
Caucassica	C8	Blue	3	0	0	0	0	0	0	0	0	0	0	0	0	0	0	0	0	0	0	0	0	0	0	0	0	0	0	0	0	0	0	0	0	0	0	0	0	0	0	0	0	0	0	0	0	0	0
Caucassica	C8	Blue	4	1	1	1	0	0	0	0	0	0	0	0	0	0	0	0	0	0	0	0	0	0	0	0	0	0	0	0	0	0	0	0	0	0	0	0	0	0	0	0	0	0	0	0	0	0	0
Caucassica	C8	Blue	5	1	1	1	1	1	1	1	1	1	1	1	1	1	0	0	0	0	0	0	0	0	0	0	0	0	0	0	0	0	0	0	1	1	1	0	1	1	1	1	1	1	1	1	0	0	0
Caucassica	C8	Blue	6	1	1	1	1	1	1	1	1	1	1	1	1	1	1	1	1	1	1	1	1	1	0	0	0	0	0	0	1	1	1	1	1	1	1	1	0	0	0	0	0	0	0	0	0	0	0
Caucassica	C8	Blue	7	1	1	1	1	1	1	1	1	1	0	0	0	0	0	1	1	1	1	1	1	1	1	1	1	1	1	1	1	1	1	1	1	1	0	0	0	0	0	0	1	1	1	1	1	1	1
Caucassica	C8	Blue	8	1	1	1	1	1	1	1	1	1	1	1	1	1	1	1	1	1	1	1	1	1	1	1	1	1	1	1	1	1	1	1	1	1	1	1	1	1	1	1	1	1	1	1	1	1	1
Caucassica	C8	Blue	9	1	1	0	0	0	0	0	0	0	0	0	0	0	0	0	0	0	0	0	0	0	0	0	0	0	0	0	0	0	0	0	0	0	0	1	1	0	0	0	0	0	0	0	0	0	0
Caucassica	C8	Blue	10	1	1	0	0	0	0	0	0	0	0	1	1	1	1	1	0	0	0	1	1	1	1	1	1	1	1	1	0	0	0	0	0	0	0	0	1	1	1	1	1	1	1	1	1	1	1
Syriaca	S3	Blue	1	1	1	0	0	0	0	0	0	0	0	0	0	0	0	0	0	0	0	0	0	0	0	0	0	0	0	0	0	0	0	0	0	0	0	0	0	0	0	0	0	0	0	0	0	0	0
Syriaca	S3	Blue	2	1	1	0	0	0	0	1	1	1	1	1	1	0	0	0	0	0	0	0	0	0	0	0	0	0	0	0	0	0	0	0	0	0	0	0	0	0	0	0	0	0	0	0	0	0	0
Syriaca	S3	Blue	3	1	1	1	1	1	0	0	0	0	0	0	0	0	0	0	0	0	0	0	0	0	0	0	0	0	0	0	0	0	0	0	0	0	0	0	0	0	0	0	0	0	0	0	0	1	0
Syriaca	S3	Blue	4	1	1	1	1	1	1	1	1	1	1	1	1	1	1	1	1	1	1	1	1	1	1	1	1	1	1	1	1	1	1	1	1	1	1	0	0	0	0	0	0	0	0	1	1	1	1
Syriaca	S3	Blue	5	1	1	0	0	1	1	1	1	1	1	1	0	0	1	1	1	1	1	0	0	0	0	0	0	0	0	0	0	0	0	0	0	0	0	0	0	0	0	0	0	0	0	0	0	0	0
Syriaca	S3	Blue	6	1	1	1	1	1	0	0	0	0	0	0	0	0	0	0	0	0	0	0	0	0	0	1	1	1	1	1	1	1	1	1	1	1	1	1	1	1	0	0	0	0	0	0	0	0	0
Syriaca	S3	Blue	7	1	1	0	1	1	1	1	1	0	0	0	0	0	1	1	1	1	0	0	0	0	0	1	1	1	1	0	0	0	0	0	0	0	0	1	1	1	1	1	0	0	0	0	0	1	1
Syriaca	S3	Blue	8	1	1	1	1	1	1	1	1	1	1	1	1	1	1	1	1	1	1	1	1	1	1	1	1	1	1	1	1	0	0	0	0	1	1	1	1	1	1	1	1	1	0	1	1	1	1
Syriaca	S3	Blue	9	1	1	1	1	1	1	0	0	1	1	1	1	1	1	1	1	1	1	1	1	0	0	0	1	1	1	1	1	1	1	1	1	1	0	0	0	1	1	1	1	1	1	1	0	1	1
Syriaca	S3	Blue	10	1	1	1	1	1	1	1	1	1	0	0	0	0	0	0	0	1	1	1	0	0	0	0	0	0	0	1	1	1	0	0	0	0	0	0	0	0	0	0	0	0	0	0	0	0	0
Caucassica	C2	Blue	1	1	1	1	1	0	0	0	0	0	0	1	1	0	0	0	0	0	0	0	1	1	1	1	1	1	0	0	0	0	0	0	0	0	1	1	0	0	1	1	1	0	0	0	0	0	0
Caucassica	C2	Blue	2	1	0	1	1	1	0	0	0	1	1	1	0	0	0	0	1	1	1	1	1	1	0	0	0	0	0	0	0	0	0	0	0	0	0	0	0	0	0	0	0	0	0	0	0	1	1
Caucassica	C2	Blue	3	1	1	1	1	1	1	0	0	0	0	0	1	1	1	1	1	1	0	0	0	0	0	1	1	1	1	1	1	1	1	1	1	1	1	1	0	0	0	0	0	0	0	0	1	1	1
Caucassica	C2	Blue	4	1	1	1	1	1	1	1	1	1	1	1	1	1	1	1	1	1	1	1	0	0	0	0	0	0	0	0	1	1	1	0	0	0	0	0	1	1	1	1	1	1	1	1	1	1	1
Caucassica	C2	Blue	5	1	1	1	1	1	1	1	0	0	0	0	0	0	0	0	0	0	0	0	0	0	0	0	1	1	1	1	1	1	1	1	1	1	1	1	0	0	0	0	0	0	0	0	0	0	0
Caucassica	C2	Blue	6	1	1	0	0	0	0	0	0	0	0	0	0	0	0	0	0	0	0	0	0	0	0	0	0	0	0	0	0	0	0	0	0	0	0	0	0	0	0	0	0	0	0	0	0	0	0
Caucassica	C2	Blue	7	1	1	1	1	0	0	0	0	0	1	1	1	1	1	1	1	1	1	1	1	1	1	1	1	1	1	1	1	0	0	0	0	0	0	0	0	0	0	0	0	0	0	0	0	0	0
Caucassica	C2	Blue	8	1	0	0	1	1	1	1	0	0	0	0	0	0	0	0	0	0	0	0	0	0	0	0	0	0	0	0	0	0	1	1	1	1	1	1	1	1	1	1	1	1	1	1	1	1	1
Caucassica	C2	Blue	9	1	1	1	1	1	1	1	1	1	1	1	0	0	0	0	0	0	0	0	0	0	0	0	0	0	0	0	0	0	0	0	0	0	0	0	0	0	0	0	0	0	0	0	0	0	0
Caucassica	C2	Blue	10	1	1	0	1	1	1	1	1	1	1	1	1	1	1	1	1	1	1	1	1	1	1	1	1	1	1	1	1	1	1	1	1	1	1	1	1	1	1	1	1	1	0	0	0	0	0
Syriaca	S1	Blue	1	1	1	1	1	1	1	1	1	0	0	0	1	1	1	1	1	1	0	0	0	1	1	1	1	1	1	1	1	1	1	0	0	0	1	1	1	1	1	1	1	1	1	1	1	1	1
Syriaca	S1	Blue	2	1	1	1	1	1	1	1	1	1	0	0	0	0	0	0	0	0	0	0	0	0	0	0	0	0	0	0	0	0	0	0	0	0	0	0	0	0	0	0	0	0	0	0	0	0	0
Syriaca	S1	Blue	3	1	1	0	0	0	0	0	0	0	0	0	0	0	1	1	1	1	0	0	0	0	0	0	0	0	0	0	0	0	0	0	0	0	0	0	0	0	0	0	0	0	0	0	0	0	0
Syriaca	S1	Blue	4	1	1	1	1	1	1	1	1	1	1	1	1	1	1	1	0	0	0	0	0	1	1	1	1	1	1	1	0	0	0	0	0	1	1	1	1	1	1	1	0	0	0	1	1	1	1
Syriaca	S1	Blue	5	1	1	1	0	0	0	0	0	0	0	1	1	1	1	1	1	1	1	1	1	1	1	1	1	1	1	1	1	1	1	1	1	1	1	1	1	1	1	1	1	1	1	0	0	0	1
Syriaca	S1	Blue	6	1	1	1	1	1	0	0	0	0	0	0	0	0	0	0	0	1	1	1	1	0	0	0	0	1	1	0	0	1	1	1	0	0	0	0	0	0	0	1	1	1	1	1	1	1	1
Syriaca	S1	Blue	7	1	1	1	1	1	1	1	1	1	1	1	1	1	1	1	1	1	1	1	0	0	0	0	0	0	0	1	1	1	1	1	1	1	0	0	0	0	1	1	1	1	1	1	1	1	1
Syriaca	S1	Blue	8	1	1	1	1	1	1	1	1	1	1	1	1	1	1	1	1	1	0	1	1	1	1	1	1	1	1	1	1	1	1	1	1	1	1	1	1	1	1	1	1	1	1	1	1	1	1
Syriaca	S1	Blue	9	1	1	1	1	0	0	0	0	0	0	0	0	0	0	0	0	0	0	0	0	0	0	0	0	0	0	0	0	1	1	1	1	0	0	0	0	0	0	0	0	0	0	0	0	0	0
Syriaca	S1	Blue	10	1	1	1	1	1	1	0	0	0	0	0	0	0	0	0	0	0	0	1	1	1	1	1	1	1	1	1	1	0	0	1	1	1	1	1	1	1	0	0	0	0	0	0	0	0	0
[truncated: 255 more columns]

## Sheet: Acquisition Counter
Race	Colony	Shock Area	Individual	0	1	2	3	4	5	6	7	8	9	10	11	12	13	14	15	16	17	18	19	20	21	22	23	24	25	26	27	28	29	30	31	32	33	34	35	36	37	38	39	40	41	42	43	44	45
Syriaca	S2	Blue	1	0	0	0	0	0	0	0	0	0	0	0	0	0	1	1	1	1	1	1	0	1	1	1	1	0	0	0	0	0	0	0	0	0	0	0	0	0	0	0	0	0	0	0	0	0	0
Syriaca	S2	Blue	2	0	0	0	0	0	0	0	0	0	0	0	0	0	0	0	0	0	0	0	0	0	0	0	0	0	0	0	0	0	0	0	0	0	0	0	0	0	0	0	0	0	0	0	0	0	0
Syriaca	S2	Blue	3	0	0	0	0	0	0	0	1	1	1	0	0	0	0	0	0	0	0	1	1	1	1	0	0	0	0	0	0	0	0	1	1	0	0	0	0	0	0	0	0	0	0	0	0	0	0
Syriaca	S2	Blue	4	0	0	0	0	0	0	0	1	1	1	1	1	0	0	0	0	0	0	0	0	0	0	0	0	0	0	0	0	0	0	1	1	1	1	1	1	1	1	1	1	0	0	0	0	0	1
Syriaca	S2	Blue	5	1	1	1	1	1	1	0	0	0	0	0	0	0	0	0	0	0	0	0	0	0	0	0	0	0	0	0	0	0	0	0	0	0	0	0	0	0	0	0	0	0	0	0	0	0	0
Syriaca	S2	Blue	6	0	0	0	0	1	1	1	1	1	1	1	1	1	1	1	1	1	1	1	0	0	0	0	1	1	1	1	1	1	1	1	1	1	1	1	1	1	1	1	1	1	0	0	1	1	1
Syriaca	S2	Blue	7	0	0	0	0	0	0	0	0	0	0	0	0	1	1	1	1	1	0	0	0	0	0	0	0	0	0	0	0	1	1	1	0	0	1	1	1	1	0	0	0	0	0	0	1	1	1
Syriaca	S2	Blue	8	0	0	0	0	0	0	0	0	0	0	0	0	0	0	0	0	0	0	0	0	0	0	0	0	0	0	0	0	0	0	0	0	0	0	0	0	0	0	0	0	0	0	0	0	0	0
Syriaca	S2	Blue	9	0	0	0	0	0	0	0	0	0	0	0	0	0	0	0	0	0	0	0	0	0	0	0	0	0	0	0	0	0	0	0	0	0	0	0	0	0	0	0	0	0	0	0	0	0	1
Syriaca	S2	Blue	10	0	0	0	0	0	0	0	0	0	0	1	1	1	1	1	0	0	0	0	0	0	1	1	1	1	1	0	0	0	0	0	1	1	1	1	1	1	1	1	1	1	1	0	0	0	0
Caucassica	C9	Blue	1	1	1	1	1	0	0	0	1	1	1	1	1	1	1	1	1	1	1	1	1	0	0	0	0	0	0	0	0	0	0	0	0	0	1	1	1	1	1	1	1	1	1	1	0	0	0
Caucassica	C9	Blue	2	0	0	0	0	0	0	0	0	0	0	0	0	0	0	0	0	0	0	0	0	0	1	1	0	1	1	0	0	0	0	0	0	0	1	1	0	0	0	0	0	0	0	0	0	0	0
Caucassica	C9	Blue	3	0	0	0	0	1	1	0	0	0	1	1	1	1	1	1	1	0	0	0	0	1	1	0	0	0	0	0	0	0	0	0	0	0	0	0	0	0	0	0	0	0	0	0	0	0	0
Caucassica	C9	Blue	4	0	0	0	0	0	0	0	0	0	0	0	0	0	0	0	0	0	0	0	0	0	0	0	0	0	0	0	0	0	0	0	0	0	0	0	0	0	0	0	1	1	1	0	0	0	0
Caucassica	C9	Blue	5	1	1	0	1	1	1	0	0	1	1	0	1	1	1	0	0	0	1	1	1	1	1	1	1	1	1	0	0	0	0	0	0	0	0	0	0	0	0	0	0	0	0	0	0	0	0
Caucassica	C9	Blue	6	1	1	1	1	1	1	1	1	1	1	1	1	1	1	1	1	1	1	1	1	1	1	1	1	1	1	1	1	1	1	1	1	1	1	1	1	1	1	1	1	1	1	1	1	1	1
Caucassica	C9	Blue	7	1	1	1	0	0	0	0	0	0	0	0	0	0	0	0	0	0	0	0	0	0	0	0	0	0	0	0	0	0	0	0	0	0	0	0	0	0	0	0	0	0	0	0	0	0	0
Caucassica	C9	Blue	8	1	1	1	1	1	0	1	1	1	1	0	0	0	1	1	1	1	1	1	1	1	1	1	1	1	1	1	1	1	1	1	1	1	1	1	1	1	1	1	1	1	1	1	1	1	1
Caucassica	C9	Blue	9	1	1	1	1	1	1	1	1	1	1	1	0	0	0	0	1	1	1	0	0	0	0	0	0	0	0	0	0	0	0	1	1	1	1	1	1	1	1	1	1	1	1	1	1	0	0
Caucassica	C9	Blue	10	1	1	1	0	0	1	1	1	1	0	0	0	0	1	1	1	0	0	0	1	1	1	1	1	1	0	0	0	0	0	1	1	1	1	1	1	0	0	0	0	0	0	0	0	0	0
Caucassica	C9	Blue	11	0	0	0	0	0	0	0	0	0	0	0	0	0	0	0	0	0	0	0	0	0	0	0	0	1	1	0	0	0	0	0	1	1	1	1	0	0	0	0	0	0	0	0	0	0	1
Caucassica	C8	Blue	1	1	1	0	0	0	0	0	0	0	0	0	0	0	0	0	0	0	0	0	0	0	1	1	1	0	0	0	0	0	0	0	0	0	0	0	0	0	0	0	0	0	0	0	0	0	0
Caucassica	C8	Blue	2	1	1	1	1	0	0	0	0	0	0	0	0	0	0	0	0	0	0	0	0	0	0	0	0	0	0	0	0	0	0	0	0	0	0	0	0	0	0	0	0	0	0	0	0	0	0
Caucassica	C8	Blue	3	1	1	0	0	0	1	1	0	0	0	0	0	0	0	0	0	0	0	0	0	0	0	0	0	0	0	1	1	1	0	0	0	0	0	0	0	0	0	0	0	0	0	0	0	0	0
Caucassica	C8	Blue	4	1	1	0	0	0	0	0	0	0	0	0	1	1	1	1	1	1	1	1	1	0	0	0	0	1	1	1	1	1	1	0	0	0	0	0	0	0	0	0	0	1	1	1	1	1	1
Caucassica	C8	Blue	5	1	1	0	0	0	1	1	1	1	1	1	1	1	0	0	0	0	0	1	1	1	1	1	1	1	0	0	0	0	0	0	0	0	0	0	0	0	0	0	0	1	1	1	1	1	1
Caucassica	C8	Blue	6	1	1	0	0	0	1	1	1	0	0	0	0	1	1	1	1	1	1	1	1	1	0	0	0	0	0	0	0	0	0	0	0	0	0	0	0	0	0	0	0	0	0	0	0	0	0
Caucassica	C8	Blue	7	1	1	0	0	1	1	1	1	1	1	1	1	1	0	0	0	0	0	1	1	1	0	0	0	0	0	0	0	0	0	1	1	1	0	0	0	0	0	0	0	0	0	0	0	0	0
Caucassica	C8	Blue	8	1	1	1	1	0	0	0	0	0	0	0	0	0	0	0	0	1	1	1	1	1	0	0	0	0	0	0	0	0	0	0	0	0	0	0	0	0	0	0	1	1	0	0	0	0	0
Caucassica	C8	Blue	9	1	1	1	0	0	0	0	0	0	0	0	1	1	1	1	1	0	0	0	0	0	0	0	0	1	1	1	1	0	0	0	0	0	1	1	1	1	0	0	0	0	0	0	0	0	0
Caucassica	C8	Blue	10	1	1	1	1	1	1	1	1	1	1	1	1	1	1	1	1	1	0	0	0	0	0	0	0	0	0	0	0	0	0	0	0	0	0	0	0	0	0	0	0	1	1	0	0	0	0
Syriaca	S3	Blue	1	1	1	0	0	0	0	0	0	1	1	0	0	1	0	0	0	1	1	1	0	0	0	0	0	0	0	0	0	0	0	0	0	0	0	0	0	0	0	0	0	1	1	0	0	0	0
Syriaca	S3	Blue	2	1	1	1	0	0	0	0	0	0	0	0	0	0	0	0	0	0	0	0	0	0	0	0	0	0	0	0	0	0	0	0	0	0	0	0	0	0	0	0	0	0	0	0	0	0	0
Syriaca	S3	Blue	3	1	1	0	0	0	0	0	0	0	0	1	1	1	1	0	0	0	0	0	0	0	0	0	0	0	0	0	0	0	0	0	0	0	0	0	0	0	0	0	0	0	0	0	0	1	1
Syriaca	S3	Blue	4	1	1	1	1	1	1	0	0	0	0	0	1	1	1	1	0	1	1	1	1	1	1	1	0	0	0	0	0	1	1	1	1	1	1	1	1	1	1	1	1	1	1	1	1	1	1
Syriaca	S3	Blue	5	1	1	0	0	0	0	0	0	0	1	1	1	1	1	1	0	0	0	0	0	0	0	0	0	0	0	0	0	0	1	1	1	1	1	0	0	0	1	1	1	1	1	1	1	0	1
Syriaca	S3	Blue	6	1	1	1	1	1	1	1	1	1	1	0	0	0	0	0	1	1	1	1	1	1	1	1	0	0	0	1	1	1	1	0	0	0	0	1	1	1	1	1	1	1	1	0	0	0	0
Syriaca	S3	Blue	7	1	1	0	0	0	0	0	0	0	0	0	0	0	0	0	0	0	0	0	0	0	0	0	0	0	0	0	0	0	0	0	1	1	1	1	1	1	1	0	0	0	0	0	0	0	0
Syriaca	S3	Blue	8	1	1	1	1	1	1	0	0	0	0	0	0	0	0	0	0	0	0	0	0	0	0	0	0	0	0	0	0	0	0	0	1	1	0	0	0	0	0	0	0	0	0	0	0	1	1
Syriaca	S3	Blue	9	1	1	1	1	0	0	0	0	0	0	1	1	1	1	1	1	0	0	0	0	0	0	0	0	0	1	1	0	0	0	0	1	1	1	1	1	1	1	0	0	0	0	0	0	0	0
Syriaca	S3	Blue	10	1	1	1	1	1	1	0	0	0	0	0	0	0	0	0	0	1	1	1	1	1	1	1	1	0	0	0	0	0	0	0	1	1	1	1	0	0	0	0	0	0	0	0	0	1	1
Caucassica	C2	Blue	1	1	1	1	1	1	1	0	0	0	1	2	3	4	5	6	7	0	0	0	1	1	1	1	1	0	0	0	0	0	0	0	0	0	0	0	0	0	0	0	0	0	0	0	0	0	0
Caucassica	C2	Blue	2	1	1	0	0	0	0	0	0	0	0	0	0	0	0	0	0	0	0	0	0	0	0	0	0	1	1	0	0	0	0	0	0	0	0	0	0	0	1	1	0	0	0	0	0	0	0
Caucassica	C2	Blue	3	1	1	1	1	1	1	0	0	0	1	1	1	1	0	0	0	0	0	0	0	0	0	0	0	0	0	0	0	0	0	0	0	1	1	1	1	0	0	0	0	0	0	0	0	0	0
Caucassica	C2	Blue	4	1	1	0	0	0	0	1	1	0	1	1	0	0	1	1	0	0	0	0	0	0	0	0	1	0	0	0	0	0	0	1	1	0	0	0	0	1	1	1	0	0	0	0	0	0	0
Caucassica	C2	Blue	5	1	1	0	0	0	1	1	0	0	0	0	1	1	1	1	0	0	0	0	0	0	0	0	0	1	0	0	0	0	0	0	0	0	0	0	0	0	0	0	0	0	0	0	0	0	0
Caucassica	C2	Blue	6	1	1	0	0	0	0	0	0	0	0	0	1	0	0	0	1	1	0	0	0	0	0	0	0	0	1	0	0	0	0	0	0	0	0	0	0	1	1	0	0	0	0	0	0	0	0
Caucassica	C2	Blue	7	1	1	1	1	1	0	0	0	0	0	0	0	0	0	0	0	0	1	1	1	1	1	1	1	1	1	1	1	1	1	1	1	1	1	1	1	1	1	1	1	1	1	1	1	1	1
Caucassica	C2	Blue	8	1	1	1	0	0	0	1	1	1	1	1	1	1	1	1	1	1	1	1	1	1	0	0	0	1	1	1	1	1	0	0	1	1	1	1	0	0	0	0	0	0	0	0	0	0	0
Caucassica	C2	Blue	9	1	1	1	0	0	0	1	1	0	0	0	0	0	1	1	1	1	1	1	0	0	0	0	0	0	0	0	0	0	0	0	0	0	0	0	0	0	0	0	0	0	0	0	0	0	0
Caucassica	C2	Blue	10	1	1	0	1	1	1	1	0	0	0	0	0	1	1	1	1	0	0	0	0	0	0	0	0	0	1	1	0	0	0	1	1	1	1	0	0	0	0	0	0	0	0	0	0	0	0
Syriaca	S1	Blue	1	1	1	1	0	0	0	0	0	0	0	0	0	0	0	0	0	0	0	0	0	0	0	1	1	1	1	0	0	0	0	0	0	0	0	0	0	0	1	1	0	0	0	0	0	0	0
Syriaca	S1	Blue	2	1	1	0	0	0	0	0	0	0	0	0	0	0	0	0	0	0	0	0	0	0	0	0	0	0	0	0	0	0	0	0	0	0	0	0	0	0	0	0	0	0	0	0	0	0	0
Syriaca	S1	Blue	3	1	1	1	1	1	0	0	0	0	0	0	1	1	0	0	0	0	0	0	0	0	0	0	0	0	0	0	0	0	0	0	0	0	0	0	0	0	0	0	0	0	0	0	0	0	0
Syriaca	S1	Blue	4	1	1	1	1	1	1	1	1	0	0	0	1	1	1	1	1	1	1	1	1	1	1	1	1	1	1	1	1	1	1	1	1	0	0	0	0	1	1	1	1	1	1	1	1	1	1
Syriaca	S1	Blue	5	1	1	0	1	1	1	1	1	1	0	0	0	0	0	1	1	1	1	1	1	1	0	0	0	0	0	1	1	1	1	1	1	1	1	1	1	1	1	1	1	1	1	1	1	1	1
Syriaca	S1	Blue	6	1	1	0	0	0	0	0	0	0	0	0	0	0	0	0	0	0	1	1	1	1	0	0	0	0	0	0	0	0	0	0	0	0	0	0	0	0	0	0	0	0	0	0	0	0	0
Syriaca	S1	Blue	7	1	1	1	1	1	0	1	1	1	1	1	0	1	1	0	1	1	0	0	1	0	0	0	0	0	0	1	1	0	0	0	0	0	0	1	1	1	1	1	1	1	0	0	0	1	1
Syriaca	S1	Blue	8	1	1	0	0	1	1	1	1	0	0	1	1	1	1	1	1	1	0	0	0	0	0	1	1	1	1	0	0	1	1	1	1	0	0	0	0	1	1	1	1	0	0	0	0	1	1
Syriaca	S1	Blue	9	1	1	1	1	1	1	1	0	0	1	1	1	0	0	0	1	1	1	1	0	0	0	1	1	1	1	0	0	0	0	1	1	1	1	0	0	0	0	1	1	0	1	1	1	1	1
Syriaca	S1	Blue	10	1	1	1	1	1	1	0	0	0	0	0	1	1	1	0	0	0	0	0	0	0	0	0	0	1	1	1	0	0	0	1	1	1	0	0	0	0	1	1	1	1	1	1	0	0	1
[truncated: 255 more columns]

## Sheet: Reversal Counter
Race	Colony	Shock Area	Individual	0	1	2	3	4	5	6	7	8	9	10	11	12	13	14	15	16	17	18	19	20	21	22	23	24	25	26	27	28	29	30	31	32	33	34	35	36	37	38	39	40	41	42	43	44	45
Syriaca	S2	Yellow	1	0	1	1	1	1	1	1	1	1	1	0	1	1	1	1	1	1	0	0	0	1	1	1	1	1	1	1	1	1	1	1	1	1	1	0	0	0	0	0	0	1	1	1	1	1	1
Syriaca	S2	Yellow	2	0	0	0	0	0	0	0	0	0	0	0	1	1	1	1	1	1	1	1	1	1	1	1	1	1	1	1	1	1	1	1	1	1	1	1	1	1	1	1	1	1	1	1	1	1	1
Syriaca	S2	Yellow	3	0	0	0	0	0	0	0	1	1	1	1	1	1	1	1	0	0	0	0	0	1	1	1	1	1	1	1	1	1	1	1	1	1	1	1	1	1	1	1	1	1	1	1	1	1	1
Syriaca	S2	Yellow	4	0	0	0	0	0	0	0	0	0	0	1	1	1	1	1	1	1	1	1	1	1	1	1	1	1	1	1	1	1	0	0	0	0	0	0	0	1	1	1	1	1	1	1	1	1	1
Syriaca	S2	Yellow	5	1	1	1	1	1	1	1	1	0	0	1	1	1	1	1	1	1	1	1	1	1	1	1	1	1	1	1	1	1	1	1	1	1	1	1	1	1	1	1	1	1	1	1	1	1	1
Syriaca	S2	Yellow	6	1	1	1	1	1	0	1	1	0	0	0	0	0	0	0	0	0	0	0	0	1	1	1	1	1	1	1	1	1	1	0	0	0	0	0	0	0	0	0	0	0	0	0	0	0	0
Syriaca	S2	Yellow	7	1	1	0	1	1	0	0	0	0	0	0	0	0	0	1	1	1	1	1	1	1	1	1	1	1	1	1	1	1	0	0	1	1	1	1	1	1	0	0	0	0	0	0	0	0	1
Syriaca	S2	Yellow	8	1	1	1	1	1	1	1	1	1	1	1	1	1	1	1	1	1	1	1	1	1	1	1	1	1	1	1	1	1	1	1	1	1	1	1	1	1	1	1	1	1	1	1	1	1	1
Syriaca	S2	Yellow	9	1	1	0	0	1	1	1	1	1	1	1	1	1	1	1	1	1	1	1	1	1	1	1	1	1	1	1	1	1	1	1	1	1	1	1	1	1	1	1	1	1	1	1	1	1	1
Syriaca	S2	Yellow	10	1	1	1	1	1	1	1	1	1	1	1	0	0	0	0	0	0	1	1	1	1	1	1	1	1	1	1	1	1	1	1	1	1	1	1	1	1	1	1	1	1	1	1	1	1	1
Caucassica	C9	Yellow	1	1	1	0	0	0	0	1	1	1	1	1	0	0	0	0	0	0	0	0	0	0	0	1	1	1	0	0	0	0	0	0	0	0	0	0	0	0	0	0	1	1	1	1	1	1	0
Caucassica	C9	Yellow	2	1	1	1	1	1	1	1	1	0	0	0	0	1	1	1	1	1	1	1	1	1	1	1	1	1	1	1	1	1	1	1	1	1	1	1	1	1	1	1	1	1	1	1	1	1	1
Caucassica	C9	Yellow	3	1	1	1	1	1	1	1	1	1	1	1	1	0	0	0	0	0	0	0	0	0	0	1	1	0	0	0	0	0	0	0	0	0	0	0	0	1	1	1	1	1	1	1	1	1	0
Caucassica	C9	Yellow	4	0	1	1	1	1	1	1	1	1	1	1	1	1	1	1	1	1	1	1	1	1	1	1	1	1	1	1	1	1	1	1	1	1	1	1	1	1	0	0	0	0	0	0	0	0	1
Caucassica	C9	Yellow	5	0	0	1	1	1	1	1	1	1	0	0	0	0	0	1	1	1	1	1	1	1	1	0	0	0	0	0	0	0	0	0	0	1	1	1	1	1	0	0	0	0	0	0	1	1	1
Caucassica	C9	Yellow	6	0	0	0	0	0	0	0	0	0	0	0	0	0	1	1	1	0	0	0	0	0	0	0	0	0	0	0	0	0	1	1	1	1	1	1	1	1	1	1	1	1	1	1	1	1	1
Caucassica	C9	Yellow	7	0	0	0	0	0	0	0	1	1	1	1	1	0	0	0	0	0	0	0	0	0	0	0	0	0	0	0	0	0	0	0	0	0	0	0	0	0	0	0	0	0	0	0	0	1	1
Caucassica	C9	Yellow	8	Lost time data	0	0	0	0	0	0	0	0	0	0	0	0	0	0	0	0	0	0	0	0	0	0	0	0	0	0	0	0	0	0	0	0	0	0	0	0	0	0	0	0	0	0	0	0	0
Caucassica	C9	Yellow	9	0	1	1	1	1	1	1	1	1	1	1	1	1	0	0	0	1	1	1	1	1	1	1	1	1	1	1	1	1	1	1	1	1	1	0	0	0	0	0	0	0	1	1	1	0	0
Caucassica	C9	Yellow	10	0	0	0	0	0	0	0	0	0	0	0	0	0	0	1	1	1	1	1	1	1	1	1	1	1	1	1	1	1	1	1	1	1	1	1	1	1	1	1	1	1	1	1	1	1	1
Caucassica	C9	Yellow	11	Stinging	0	0	0	0	0	0	0	0	0	0	0	0	0	0	0	0	0	0	0	0	0	0	0	0	0	0	0	0	0	0	0	0	0	0	0	0	0	0	0	0	0	0	0	0	0
Caucassica	C8	Yellow	1	0	1	1	1	1	1	0	0	0	0	0	0	0	0	0	0	0	0	1	1	0	0	0	0	0	0	0	0	0	0	0	0	0	0	0	0	0	0	0	0	0	0	0	0	0	0
Caucassica	C8	Yellow	2	0	0	0	0	0	0	0	0	0	0	0	0	0	0	0	1	1	1	1	1	1	1	1	1	1	0	0	0	0	0	0	1	1	1	1	1	1	1	1	1	1	1	1	1	1	1
Caucassica	C8	Yellow	3	0	1	1	1	0	0	1	1	1	1	1	1	0	0	0	0	0	0	0	0	0	0	0	0	0	0	0	0	0	0	0	0	1	1	1	0	1	1	1	1	0	0	0	0	0	0
Caucassica	C8	Yellow	4	0	0	0	1	1	1	1	1	1	0	0	0	0	0	0	1	1	1	1	1	1	1	1	1	1	1	1	1	1	1	1	1	1	1	1	1	1	1	1	1	1	1	1	1	1	1
Caucassica	C8	Yellow	5	0	1	1	1	1	1	1	1	1	1	1	1	1	1	1	1	1	1	1	1	1	1	1	1	1	1	1	1	1	1	1	1	1	1	1	0	0	0	0	0	1	1	1	1	1	1
Caucassica	C8	Yellow	6	0	0	0	0	0	0	0	0	0	0	0	0	0	0	0	0	0	0	0	0	0	0	0	0	0	0	0	0	0	0	0	0	0	0	0	0	0	0	0	0	0	0	0	0	0	0
Caucassica	C8	Yellow	7	1	1	1	1	1	1	1	1	1	1	1	1	1	1	1	1	1	1	0	0	0	0	0	0	0	0	0	0	0	0	1	1	1	1	1	1	1	1	1	1	1	1	1	1	1	1
Caucassica	C8	Yellow	8	1	1	1	1	1	1	1	1	1	1	1	1	1	1	1	1	1	0	0	1	1	1	1	1	1	1	1	1	1	1	1	1	1	1	1	1	1	1	1	1	1	1	1	1	1	1
Caucassica	C8	Yellow	9	1	1	1	1	1	1	0	1	1	1	1	1	1	1	1	1	0	0	0	0	0	0	0	0	0	0	1	1	1	1	1	1	1	1	1	1	1	1	1	1	1	1	1	1	1	1
Caucassica	C8	Yellow	10	1	1	1	1	1	1	1	1	1	1	1	1	1	1	1	1	1	1	1	1	1	1	1	1	0	0	0	0	0	0	0	1	1	1	1	1	1	1	1	1	1	1	1	1	1	1
Syriaca	S3	Yellow	1	0	1	1	1	1	1	1	1	1	1	1	1	1	1	1	1	1	1	1	1	1	1	1	1	1	1	1	1	1	1	1	1	1	1	1	1	1	1	1	1	1	1	1	1	1	1
Syriaca	S3	Yellow	2	0	0	0	0	0	0	1	1	1	0	0	0	0	0	0	0	0	0	0	0	0	1	1	1	1	1	1	1	1	0	1	1	0	0	0	0	0	0	0	1	1	1	1	1	1	1
Syriaca	S3	Yellow	3	0	0	0	0	0	0	0	0	0	0	0	0	0	0	0	0	0	0	0	1	1	0	0	0	0	1	1	1	1	1	1	1	1	1	1	1	1	1	0	0	0	0	0	1	1	1
Syriaca	S3	Yellow	4	0	0	0	0	1	1	1	1	1	1	1	1	1	1	1	1	1	1	1	1	1	1	1	0	0	0	0	1	1	1	1	1	1	1	1	1	0	1	1	1	1	1	1	1	1	1
Syriaca	S3	Yellow	5	0	1	1	1	1	1	1	1	1	0	0	0	0	1	1	1	1	1	1	1	0	0	0	0	0	1	1	1	1	1	1	0	0	0	0	0	1	1	1	1	0	0	0	0	0	0
Syriaca	S3	Yellow	6	0	0	0	0	0	0	0	0	0	0	0	0	0	0	1	1	1	1	1	1	1	1	1	1	0	0	0	0	1	1	1	1	1	1	1	1	0	0	0	0	0	0	1	1	1	1
Syriaca	S3	Yellow	7	0	0	0	0	0	0	0	0	1	1	1	1	1	1	1	1	1	1	1	1	1	1	1	1	1	1	1	1	1	1	1	1	1	1	1	1	1	1	1	1	1	1	1	1	1	1
Syriaca	S3	Yellow	8	0	0	0	1	1	1	0	0	0	1	1	1	1	0	0	1	1	1	1	1	1	0	0	0	1	1	1	1	1	1	1	0	0	0	0	0	0	1	1	1	1	1	0	0	0	1
Syriaca	S3	Yellow	9	0	0	0	0	0	0	0	0	0	0	0	1	1	1	1	1	1	1	0	0	0	0	0	0	0	1	0	0	0	0	0	0	1	1	1	1	1	1	1	0	0	0	0	0	0	0
Syriaca	S3	Yellow	10	0	0	1	1	1	0	0	0	0	0	0	0	0	0	0	0	1	1	1	1	0	0	0	0	0	0	0	0	1	1	1	1	1	1	1	1	1	1	1	1	1	1	0	0	1	1
Caucassica	C2	Yellow	1	0	0	0	0	0	0	0	0	0	0	0	0	0	0	0	0	0	0	0	0	0	0	0	1	0	1	1	0	0	1	1	0	0	0	0	0	0	0	0	0	0	0	0	0	0	0
Caucassica	C2	Yellow	2	0	0	0	0	0	1	1	1	1	0	0	0	0	0	0	0	0	0	1	0	0	0	0	0	0	0	0	1	1	1	1	1	1	1	1	1	1	1	1	1	1	1	1	1	1	1
Caucassica	C2	Yellow	3	1	1	0	0	1	1	1	1	1	1	1	1	1	1	1	1	1	1	1	1	1	1	1	1	1	1	1	1	1	0	0	0	0	0	0	1	1	1	1	1	1	1	1	1	1	1
Caucassica	C2	Yellow	4	0	1	1	1	1	1	1	1	1	1	1	1	1	1	1	1	1	1	1	1	1	1	1	1	1	1	0	0	1	1	1	1	1	1	1	1	0	0	0	0	0	0	0	1	1	1
Caucassica	C2	Yellow	5	0	1	1	1	1	1	1	1	1	1	1	1	0	0	0	0	0	0	0	0	1	1	1	1	1	1	0	1	1	1	1	1	1	0	0	0	0	1	1	1	1	1	1	1	1	1
Caucassica	C2	Yellow	6	0	0	0	0	0	0	1	1	1	0	0	0	0	0	0	0	0	0	0	0	1	1	1	0	0	0	0	0	0	1	1	1	1	1	1	1	1	1	1	1	1	1	1	1	1	1
Caucassica	C2	Yellow	7	0	0	0	0	0	0	1	1	1	1	0	0	0	1	1	1	0	0	0	0	0	1	1	1	1	1	1	1	1	0	0	0	0	0	1	1	1	1	0	0	0	0	0	0	0	1
Caucassica	C2	Yellow	8	0	0	0	0	0	0	0	0	0	0	0	0	0	0	0	1	1	1	1	1	1	1	1	1	1	0	0	0	0	0	1	1	1	1	0	0	0	0	0	0	0	0	0	0	0	0
Caucassica	C2	Yellow	9	0	1	1	1	1	1	1	1	1	0	0	0	0	0	1	1	1	1	1	1	1	1	1	0	0	0	0	0	0	0	1	1	1	1	1	1	1	1	1	1	1	1	1	0	0	0
Caucassica	C2	Yellow	10	0	0	1	1	1	0	0	1	1	1	0	0	0	1	1	1	1	1	1	0	0	1	1	1	1	1	1	1	1	1	1	0	0	0	0	0	0	0	0	0	0	0	1	1	0	0
Syriaca	S1	Yellow	1	1	1	1	1	1	1	1	1	1	0	0	0	0	0	0	0	0	0	0	0	0	0	0	0	0	0	0	0	0	0	0	0	0	0	1	1	1	1	1	1	0	0	1	1	1	1
Syriaca	S1	Yellow	2	0	1	1	1	1	1	1	1	1	1	1	1	1	1	1	1	1	1	1	1	1	1	1	1	0	0	0	0	0	0	0	0	1	1	1	1	1	1	0	0	0	0	0	0	0	0
Syriaca	S1	Yellow	3	0	0	0	0	0	0	0	1	1	0	0	0	0	0	0	0	0	0	0	0	0	0	0	0	0	0	0	1	1	0	0	0	0	0	0	0	0	0	0	0	0	0	0	0	0	0
Syriaca	S1	Yellow	4	0	0	0	0	0	0	0	0	0	0	0	0	0	0	0	0	0	0	0	0	0	0	0	0	0	0	0	0	0	0	0	0	0	0	0	0	0	0	0	1	1	1	1	1	1	1
Syriaca	S1	Yellow	5	0	0	0	0	0	0	0	0	0	0	0	0	0	0	0	0	0	0	0	0	0	0	0	0	0	0	0	0	0	0	0	0	0	0	0	0	0	0	0	0	0	0	0	0	0	0
Syriaca	S1	Yellow	6	0	0	0	1	1	1	1	1	1	1	1	1	1	1	1	1	0	0	0	0	0	0	0	0	0	0	1	1	1	1	1	0	0	0	1	1	1	1	0	0	0	0	0	0	1	1
Syriaca	S1	Yellow	7	0	0	0	0	0	0	0	0	0	0	0	0	0	0	0	0	0	0	0	0	0	0	0	0	0	0	0	0	0	0	0	0	1	1	0	0	0	0	0	0	0	0	0	1	1	1
Syriaca	S1	Yellow	8	0	0	0	0	0	1	1	1	1	1	1	1	1	1	1	1	1	1	1	1	1	1	1	1	1	1	0	0	0	0	0	0	0	0	0	0	0	0	0	0	0	0	0	1	1	1
Syriaca	S1	Yellow	9	0	0	0	1	1	1	1	0	0	0	1	1	1	1	1	0	0	1	1	1	1	1	1	1	1	1	1	1	1	1	1	1	1	1	1	1	1	1	1	1	1	1	1	1	1	1
Syriaca	S1	Yellow	10	0	0	0	0	0	0	0	0	1	1	0	0	0	0	0	1	1	1	1	1	1	0	0	0	1	1	1	1	1	1	1	0	1	1	1	1	1	0	0	0	0	0	0	0	0	0
[truncated: 255 more columns]

## Sheet: Summary
Race	Colony	Treatment	Individual	Acquisition	Reversal	Acquisition Proportion	Reversal Proportion		1A	2A	3A	4A	5A	1B	2B	3B	4B	5B		Delta	DN
Syriaca	S1	Original	1	73	125	0.243333	0.416667		17	10	20	26	0	45	34	16	16	6		-0.1734	1
Syriaca	S1	Original	2	57	0	0.19	0		21	35	1	0	0	0	0	0	0	0		0.04333	2
Syriaca	S1	Original	3	66	53	0.22	0.176667		23	11	7	25	0	3	11	5	14	19		-0.25	1
Syriaca	S1	Original	4	127	202	0.423333	0.673333		34	29	14	44	6	38	31	48	38	40		-0.4	1
Caucassica	C9	Original	1	10	130	0.0333333	0.433333		10	0	0	0	0	61	48	14	0	0		-0.8933	1
Caucassica	C9	Original	2	9	277	0.03	0.923333		4	3	2	0	0	58	42	50	59	60		-0.4067	1
Caucassica	C9	Original	3	34	156	0.113333	0.52		17	8	9	0	0	55	52	24	17	0		-0.22	1
Caucassica	C9	Original	4	88	154	0.293333	0.513333		5	16	50	2	15	46	30	27	18	27		-0.03003	1
Caucassica	C9	Original	5	67	76	0.223333	0.253333		32	17	8	8	2	30	13	3	14	16		0.05003	2
Caucassica	C9	Original	6	113	98	0.376667	0.326667		33	37	30	12	1	20	17	18	26	12		-0.12	1
Caucassica	C9	Original	7	118	154	0.393333	0.513333		27	30	17	14	30	51	50	3	0	42		-0.08337	1
Caucassica	C9	Original	8	100	125	0.333333	0.416667		24	24	26	21	5	27	16	14	48	20		-0.7834	1
Caucassica	C9	Original	9	61	296	0.203333	0.986667		27	17	0	15	2	56	52	60	60	60		-0.0767	1
Syriaca	S2	Original	1	103	126	0.343333	0.42		26	27	20	16	14	19	25	17	32	25		-0.15	1
Syriaca	S2	Original	2	69	114	0.23	0.38		24	2	27	8	8	14	9	17	27	47		0.1433	2
Syriaca	S2	Original	3	239	155	0.796667	0.516667		44	49	55	37	54	43	23	27	43	17		-0.19	1
Syriaca	S2	Original	4	195	86	0.65	0.286667		40	54	56	22	23	23	14	23	8	18		0.63	2
Syriaca	S2	Original	5	63	20	0.21	0.0666667		28	19	12	0	4	8	0	0	1	11		-3.302e-05	1
Syriaca	S2	Original	6	171	228	0.57	0.76		29	52	24	47	19	35	34	53	55	48		-0.003333	1
Syriaca	S2	Original	7	210	21	0.7	0.07		49	27	60	22	52	14	0	7	0	0		0.05997	2
Syriaca	S2	Original	8	214	214	0.713333	0.713333		51	41	17	49	56	32	52	60	58	4		3.3e-05	2
Syriaca	S2	Original	9	117	118	0.39	0.393333		41	24	35	6	11	27	16	30	15	30		0.05333	2
Syriaca	S2	Original	10	118	100	0.393333	0.333333		23	20	26	27	22	39	17	12	7	17		0.1567	2
Caucassica	C8	Original	1	8	8	0.0266667	0.0266667		5	3	0	0	0	6	2	0	0	0		0.1133	2
Caucassica	C8	Original	2	111	95	0.37	0.316667		17	39	22	7	26	29	17	27	17	5		0.04333	2
Caucassica	C8	Original	3	53	6	0.176667	0.02		4	30	2	2	15	0	2	0	0	4		0.0833	2
Caucassica	C8	Original	4	0	77	0	0.256667		0	0	0	0	0	3	24	25	0	25		-0.1434	1
Caucassica	C8	Original	5	90	56	0.3	0.186667		30	25	18	15	2	29	12	12	0	0		0.47	2
Caucassica	C8	Original	6	42	29	0.14	0.0966667		18	0	0	18	6	29	0	0	0	0		0.06003	2
Caucassica	C8	Original	7	187	162	0.623333	0.54		55	52	35	30	15	49	21	43	7	36		-0.4433	1
Caucassica	C8	Original	8	100	143	0.333333	0.476667		30	26	15	7	22	53	23	30	27	10		0.04333	2
Caucassica	C8	Original	9	186	45	0.62	0.15		33	36	31	43	43	6	11	6	16	6		0.2333	2
Caucassica	C8	Original	10	179	161	0.596667	0.536667		36	32	36	34	41	38	22	35	32	28		-0.2533	1
Syriaca	S3	Original	1	23	156	0.0766667	0.52		7	9	3	4	0	2	2	32	60	60		-0.3934	1
Syriaca	S3	Original	2	42	29	0.14	0.0966667		9	15	0	11	7	8	10	0	0	11		0.4333	2
Syriaca	S3	Original	3	112	42	0.373333	0.14		24	25	17	12	34	6	13	2	8	8		0.04663	2
Syriaca	S3	Original	4	105	181	0.35	0.603333		44	36	12	10	3	49	26	42	27	29		-0.4967	1
Syriaca	S3	Original	5	40	158	0.133333	0.526667		10	16	2	10	2	27	37	39	7	42		-0.22	1
Syriaca	S3	Original	6	187	57	0.623333	0.19		17	9	49	52	60	20	2	21	7	7		0.0533	2
Syriaca	S3	Original	7	127	113	0.423333	0.376667		40	27	34	21	5	22	27	10	15	35		-0.1133	1
Syriaca	S3	Original	8	40	189	0.133333	0.63		17	11	5	4	3	53	49	39	26	16		0.1	2
Syriaca	S3	Original	9	91	157	0.303333	0.523333		36	20	13	22	0	51	26	40	19	13		0.01997	2
Syriaca	S3	Original	10	67	51	0.223333	0.17		30	18	8	10	1	19	0	19	1	8		-0.5733	1
Caucassica	C2	Original	1	125	159	0.416667	0.53		38	28	35	24	0	24	29	23	38	42		0.03663	2
Caucassica	C2	Original	2	114	84	0.38	0.28		35	12	28	21	18	21	3	21	35	4		0.0633	2
Caucassica	C2	Original	3	148	142	0.493333	0.473333		33	22	40	24	29	43	37	15	7	36		-0.1067	1
Caucassica	C2	Original	4	69	241	0.23	0.803333		34	10	16	9	0	48	25	60	54	52		-0.1733	1
Caucassica	C2	Original	5	127	116	0.423333	0.386667		38	35	27	27	0	29	11	33	18	17		0.08003	2
Caucassica	C2	Original	6	76	57	0.253333	0.19		8	22	20	3	23	12	10	13	17	5		-0.21	1
Caucassica	C2	Original	7	135	167	0.45	0.556667		34	20	27	48	6	34	47	26	30	22		-0.2133	1
Caucassica	C2	Original	8	86	138	0.286667	0.46		29	5	24	20	8	28	39	55	0	14		0.06997	2
Caucassica	C2	Original	9	125	101	0.416667	0.336667		27	22	16	28	32	11	24	24	12	22		0.03663	2
Caucassica	C2	Original	10	85	148	0.283333	0.493333		21	28	17	14	5	43	34	38	24	9		-0.2266	1
Syriaca	S1	Original	1	81	145	0.27	0.483333		20	11	19	30	1	50	40	19	18	10		-0.1133	1
Syriaca	S1	Original	2	49	28	0.163333	0.0933333		6	4	13	20	6	9	0	13	0	6		-0.16	1
Syriaca	S1	Original	3	76	65	0.253333	0.216667		24	12	9	30	1	6	13	6	16	23		-0.6967	1
Syriaca	S1	Original	4	143	211	0.476667	0.703333		39	35	18	44	7	42	31	48	43	40		0.02997	2
Syriaca	S1	Original	5	23	107	0.0766667	0.356667		8	4	5	1	5	50	21	21	9	0		0.2666	2
Syriaca	S1	Original	6	111	145	0.37	0.483333		40	19	17	25	10	27	15	26	31	42		-0.69	1
Syriaca	S1	Original	7	133	181	0.443333	0.603333		32	25	43	22	11	50	24	45	36	21		-0.07997	1
Syriaca	S1	Original	8	60	269	0.2	0.896667		22	9	7	7	15	59	52	60	53	38		-0.89	1
Syriaca	S1	Original	9	49	40	0.163333	0.133333		17	11	0	4	17	8	2	7	13	10		0.1866	2
Syriaca	S1	Original	10	160	80	0.533333	0.266667		37	45	25	31	22	23	4	13	23	17		-0.5	1
Syriaca	S2	Counterbalance	1	76	180	0.253333	0.6		12	27	0	0	37	48	35	28	41	26		-0.03003	1
Syriaca	S2	Counterbalance	2	142	262	0.473333	0.873333		0	0	31	54	57	50	52	53	60	39		-0.5734	1
Syriaca	S2	Counterbalance	3	56	263	0.186667	0.876667		9	16	13	15	3	49	46	52	59	49		0.01333	2
Syriaca	S2	Counterbalance	4	131	155	0.436667	0.516667		20	27	29	25	30	44	23	23	24	33		-0.2866	1
Syriaca	S2	Counterbalance	5	9	276	0.03	0.92		6	0	3	0	0	59	52	46	53	58		-0.7	1
Syriaca	S2	Counterbalance	6	190	134	0.633333	0.446667		46	38	54	27	25	23	24	31	34	20		-0.28	1
Syriaca	S2	Counterbalance	7	62	212	0.206667	0.706667		24	4	13	7	14	41	42	51	31	39		-0.05997	1
Syriaca	S2	Counterbalance	8	187	196	0.623333	0.653333		0	36	60	60	31	61	36	13	33	45		0.08003	2
Syriaca	S2	Counterbalance	9	34	206	0.113333	0.686667		16	16	0	0	2	59	39	34	24	42		0.0967	2
Syriaca	S2	Counterbalance	10	177	173	0.59	0.576667		26	31	31	44	45	55	25	35	36	16		0.08337	2
Caucassica	C9	Counterbalance	1	59	145	0.196667	0.483333		29	20	3	7	0	22	40	40	16	21		-0.0267	1
Caucassica	C9	Counterbalance	2	10	220	0.0333333	0.733333		6	0	0	0	4	57	51	39	57	8		-0.17	1
Caucassica	C9	Counterbalance	3	32	116	0.106667	0.386667		11	4	13	4	0	23	16	43	7	27		-0.3166	1
Caucassica	C9	Counterbalance	4	131	149	0.436667	0.496667		3	12	55	39	22	52	31	11	34	19		-0.2766	1
Caucassica	C9	Counterbalance	5	197	173	0.656667	0.576667		19	26	60	60	32	30	27	34	36	38		-0.2633	1
Caucassica	C9	Counterbalance	6	173	144	0.576667	0.48		54	27	19	34	39	21	27	36	27	29		-0.4066	1
Caucassica	C9	Counterbalance	7	131	106	0.436667	0.353333		11	35	23	29	33	13	14	23	26	26		-0.29	1
Caucassica	C9	Counterbalance	8	281	0	0.936667	0		57	60	60	60	44	0	0	0	0	0		-0.1367	1
Caucassica	C9	Counterbalance	9	73	81	0.243333	0.27		28	5	27	4	9	33	10	8	21	9		-0.4967	1
Caucassica	C9	Counterbalance	10	162	213	0.54	0.71		30	20	30	53	29	47	43	22	49	45		-0.14	1
Caucassica	C9	Counterbalance	11	224	0	0.746667	0		11	45	58	50	60	0	0	0	0	0		-0.03667	1
Caucassica	C8	Counterbalance	1	20	115	0.0666667	0.383333		5	2	0	3	10	12	26	30	21	26		0.42	2
Caucassica	C8	Counterbalance	2	114	74	0.38	0.246667		18	22	23	2	49	30	9	30	5	0		-0.38	1
Caucassica	C8	Counterbalance	3	23	106	0.0766667	0.353333		7	0	8	6	2	20	28	12	25	21		-0.6733	1
Caucassica	C8	Counterbalance	4	83	162	0.276667	0.54		29	12	15	18	9	52	32	34	19	23		0.009967	2
Caucassica	C8	Counterbalance	5	107	229	0.356667	0.763333		34	29	6	22	16	53	32	42	53	46		0.03663	2
Caucassica	C8	Counterbalance	6	37	124	0.123333	0.413333		14	2	0	13	8	5	22	9	41	47		-0.63	1
Caucassica	C8	Counterbalance	7	67	108	0.223333	0.36		17	7	28	10	5	38	10	15	31	14		-0.18	1
Caucassica	C8	Counterbalance	8	42	191	0.14	0.636667		15	13	14	0	0	58	21	41	37	26		0.02997	2
Caucassica	C8	Counterbalance	9	89	131	0.296667	0.436667		16	20	14	13	26	48	51	4	12	8		-0.34	1
Caucassica	C8	Counterbalance	10	192	203	0.64	0.676667		30	31	27	55	49	43	37	43	47	25		-0.0433	1
Syriaca	S3	Counterbalance	1	243	117	0.81	0.39		20	47	58	60	58	60	0	22	7	23		-0.1033	1
Syriaca	S3	Counterbalance	2	28	142	0.0933333	0.473333		3	9	0	0	16	26	19	25	30	36		-0.5467	1
Syriaca	S3	Counterbalance	3	51	253	0.17	0.843333		13	18	8	8	4	33	45	56	60	55		-0.3833	1
Syriaca	S3	Counterbalance	4	155	201	0.516667	0.67		42	14	26	29	44	46	37	34	40	39		-0.1067	1
Syriaca	S3	Counterbalance	5	136	133	0.453333	0.443333		29	6	8	48	45	25	30	10	31	32		0.006667	2
Syriaca	S3	Counterbalance	6	178	167	0.593333	0.556667		41	35	39	36	27	28	25	44	36	28		-0.2134	1
Syriaca	S3	Counterbalance	7	23	212	0.0766667	0.706667		13	0	0	8	2	53	19	48	39	47		-0.4566	1
Syriaca	S3	Counterbalance	8	151	205	0.503333	0.683333		22	34	25	35	35	35	20	39	51	57		-0.36	1
Syriaca	S3	Counterbalance	9	85	76	0.283333	0.253333		28	11	6	11	29	15	22	22	6	11		-0.1433	1
Syriaca	S3	Counterbalance	10	104	206	0.346667	0.686667		21	15	17	26	25	25	46	42	46	40		0.02333	2
Caucassica	C2	Counterbalance	1	47	60	0.156667	0.2		42	3	0	0	2	5	29	8	14	4		0.1734	2
Caucassica	C2	Counterbalance	2	59	90	0.196667	0.3		9	0	23	6	21	39	5	6	16	22		0.2333	2
Caucassica	C2	Counterbalance	3	25	189	0.0833333	0.63		14	3	5	0	3	40	22	37	48	42		-0.1133	1
Caucassica	C2	Counterbalance	4	65	180	0.216667	0.6		22	6	7	25	5	51	28	39	25	36		0.1833	2
Caucassica	C2	Counterbalance	5	67	99	0.223333	0.33		9	0	14	37	7	41	9	19	16	14		0.18	2
Caucassica	C2	Counterbalance	6	76	162	0.253333	0.54		12	27	14	10	13	38	31	37	30	18		-0.52	1
Caucassica	C2	Counterbalance	7	102	100	0.34	0.333333		39	18	24	21	0	23	22	9	23	21		-0.003333	1
Caucassica	C2	Counterbalance	8	103	167	0.343333	0.556667		40	33	22	6	2	16	28	37	47	34
Caucassica	C2	Counterbalance	9	38	175	0.126667	0.583333		15	13	5	5	0	30	46	38	36	25
Caucassica	C2	Counterbalance	10	43	151	0.143333	0.503333		16	5	2	15	5	30	40	24	17	38
Syriaca	S1	Counterbalance	1	9	211	0.03	0.703333		9	0	0	0	0	29	31	55	42	48
Syriaca	S1	Counterbalance	2	35	78	0.116667	0.26		2	15	4	4	10	29	0	12	13	24
Syriaca	S1	Counterbalance	3	18	11	0.06	0.0366667		7	0	2	0	9	6	2	0	0	0
Syriaca	S1	Counterbalance	4	257	205	0.856667	0.683333		49	50	50	60	48	13	43	49	50	42
Syriaca	S1	Counterbalance	5	178	108	0.593333	0.36		45	24	54	37	18	0	0	23	46	39
Syriaca	S1	Counterbalance	6	35	69	0.116667	0.23		10	0	10	7	8	31	20	16	2	0
Syriaca	S1	Counterbalance	7	79	24	0.263333	0.08		32	12	6	17	12	8	2	1	12	1
Syriaca	S1	Counterbalance	8	125	71	0.416667	0.236667		35	35	22	26	7	34	18	0	2	13
Syriaca	S1	Counterbalance	9	88	244	0.293333	0.813333		38	16	15	4	15	52	48	42	54	40
Syriaca	S1	Counterbalance	10	141	142	0.47	0.473333		34	33	32	20	22	20	21	36	36	29

## Sheet: Sheet1
Race	Colony	Treatment	Individual
Syriaca	S1	Original	1	0	0	0	0	1	1	2	3	3	3	2	0	0	0	2	0	0	0	0	0	0	0	0	0	0	0	0	1	3	3	3	0	0	0	0	0	0	0	0	0	0	3	0	1	3	2
Syriaca	S1	Original	2	0	1	0	2	2	0	0	0	0	0	1	3	3	3	3	3	0	0	0	0	0	0	0	3	3	3	3	3	3	3	3	3	3	3	2	0	0	0	0	0	0	0	0	1	0	0
Syriaca	S1	Original	3	0	0	0	0	0	0	0	0	0	0	2	3	0	0	3	3	3	3	3	3	3	3	3	2	0	0	0	0	0	0	0	0	0	0	0	0	0	0	0	0	0	0	0	0	0	0
Syriaca	S1	Original	4	0	0	1	3	2	0	1	3	0	2	3	3	0	3	3	3	0	1	3	3	2	1	0	1	1	3	3	3	3	3	1	0	0	0	0	3	1	0	2	2	0	2	2	0	3	0
Caucassica	C9	Original	1	0	0	0	0	0	0	0	0	0	0	2	3	3	2	0	0	0	0	0	0	0	0	0	0	0	0	0	0	0	0	0	0	0	0	0	0	0	0	0	0	0	0	0	0	0	0
Caucassica	C9	Original	2	0	0	0	2	0	0	0	0	2	0	0	0	0	0	0	0	0	0	0	0	0	0	0	0	0	0	0	0	1	2	0	0	0	0	0	0	0	0	0	0	0	0	0	0	0	0
Caucassica	C9	Original	3	2	3	3	3	1	0	0	0	0	0	0	0	0	0	1	1	0	0	3	0	0	0	2	3	3	0	0	0	0	0	0	0	0	0	0	0	0	0	0	0	0	0	0	0	0	1
Caucassica	C9	Original	4	0	3	2	0	0	0	0	0	0	0	0	0	0	0	0	0	0	0	0	0	0	0	0	0	0	0	0	0	0	0	0	2	0	0	0	2	3	3	3	3	3	3	3	3	3	3
Caucassica	C9	Original	5	0	2	3	1	1	3	3	1	1	2	3	2	1	3	3	0	2	0	0	1	1	3	3	3	3	0	0	0	0	0	2	2	0	0	0	0	0	0	0	0	0	0	0	0	0	0
Caucassica	C9	Original	6	3	0	0	0	0	3	3	3	3	3	3	3	1	0	0	0	0	2	3	3	3	3	3	0	0	2	3	3	3	0	0	0	3	3	3	1	0	1	3	3	3	3	1	0	0	2
Caucassica	C9	Original	7	0	3	2	0	0	1	3	1	0	2	3	3	0	0	3	0	0	3	3	0	0	2	3	3	0	0	2	3	2	1	3	3	1	0	0	0	0	3	3	1	0	0	0	0	3	1
Caucassica	C9	Original	8	2	1	3	1	0	0	0	0	0	0	0	0	1	1	2	3	3	3	1	3	3	3	1	0	0	0	0	2	3	1	0	0	0	0	0	0	2	3	3	3	3	3	3	3	2	0
Caucassica	C9	Original	9	1	3	3	2	1	3	1	2	0	0	2	3	2	0	0	0	1	3	0	0	0	0	0	0	0	2	0	2	2	0	0	0	0	0	2	0	2	2	3	2	0	0	0	0	0	0
Syriaca	S2	Original	1	0	0	0	0	3	3	3	2	0	1	3	1	0	0	0	1	3	3	3	0	0	2	3	0	0	3	3	1	0	0	0	0	0	2	3	3	3	1	0	3	3	3	3	0	0	0
Syriaca	S2	Original	2	0	0	3	1	3	3	3	2	2	3	0	2	0	2	0	0	0	0	0	0	0	0	0	0	0	0	0	0	0	0	2	0	0	0	0	0	0	0	0	0	0	0	2	1	1	3
Syriaca	S2	Original	3	0	0	0	0	0	2	3	3	3	3	3	3	3	3	3	3	3	3	3	3	3	3	3	3	3	3	3	3	3	3	3	3	3	3	1	0	0	0	3	3	3	3	3	3	3	3
Syriaca	S2	Original	4	0	0	0	2	3	3	3	3	3	3	3	3	3	1	1	3	3	0	0	3	3	3	1	0	2	3	3	3	3	3	3	3	3	3	3	3	3	3	3	3	3	3	3	3	3	3
Syriaca	S2	Original	5	3	1	2	3	3	3	0	0	0	0	0	2	3	3	2	0	0	0	2	0	0	0	2	3	3	3	3	1	0	0	0	2	1	0	0	0	0	0	0	1	3	3	3	3	0	0
Syriaca	S2	Original	6	3	2	0	0	0	3	3	3	1	0	3	1	0	0	0	0	0	3	3	3	2	2	3	3	3	3	3	3	3	3	3	3	1	0	2	3	3	3	3	3	3	3	3	0	0	0
Syriaca	S2	Original	7	1	3	1	2	3	0	2	0	3	3	3	3	3	3	3	3	3	3	3	3	3	3	3	3	0	0	0	0	0	0	0	0	0	0	0	3	3	3	3	3	3	3	3	3	3	3
Syriaca	S2	Original	8	3	2	2	3	3	1	1	2	3	3	2	2	3	3	3	3	3	3	3	2	0	3	2	0	3	3	1	1	3	3	3	3	3	1	1	3	2	0	3	3	2	0	0	0	0	2
Syriaca	S2	Original	9	0	0	2	3	3	3	3	3	3	0	2	3	3	3	2	0	2	2	1	3	3	3	2	0	0	0	0	0	0	0	0	3	3	3	2	1	3	1	0	0	0	0	3	3	1	3
Syriaca	S2	Original	10	0	0	2	0	0	0	1	3	3	0	1	3	3	2	0	0	0	0	2	3	3	3	3	3	1	0	1	3	3	0	0	0	0	0	0	0	0	0	0	0	1	3	3	3	3	3
Caucassica	C8	Original	1	0	0	1	3	1	0	0	0	0	0	0	0	0	0	0	0	0	0	0	0	0	0	0	3	0	0	0	0	0	0	0	0	0	0	0	0	0	0	0	0	0	0	0	0	0	0
Caucassica	C8	Original	2	0	0	0	0	0	2	2	0	0	1	3	2	0	0	2	0	0	0	2	3	3	3	3	3	3	3	3	3	3	0	0	0	0	3	1	0	0	2	3	3	3	3	3	0	0	0
Caucassica	C8	Original	3	0	0	0	0	0	0	0	0	0	0	0	0	0	2	0	0	0	0	1	1	0	0	0	2	0	0	0	0	0	0	3	3	3	3	3	1	3	3	3	3	2	0	0	0	0	0
Caucassica	C8	Original	4	0	0	0	0	0	0	0	0	0	0	0	0	0	0	0	0	0	0	0	0	0	0	0	0	0	0	0	0	0	0	0	0	0	0	0	0	0	0	0	0	0	0	0	0	0	0
Caucassica	C8	Original	5	2	0	2	2	0	3	2	0	2	1	0	2	2	1	1	3	0	3	3	1	3	2	0	0	2	3	2	0	0	0	0	3	1	1	3	0	1	3	1	0	0	0	0	0	0	2
Caucassica	C8	Original	6	0	0	0	0	3	3	3	3	3	3	0	0	0	0	0	0	0	0	0	0	0	0	0	0	0	0	0	0	0	0	0	0	0	0	0	0	0	0	0	0	0	0	0	0	0	0
Caucassica	C8	Original	7	1	3	3	3	3	3	3	3	3	3	3	3	3	3	3	3	3	3	3	0	0	0	3	3	3	3	3	3	3	3	2	3	3	3	3	3	3	2	3	3	1	3	3	2	1	3
Caucassica	C8	Original	8	2	0	3	3	1	1	0	0	0	2	1	3	1	3	3	3	3	1	0	0	1	3	3	3	3	3	3	3	2	0	0	0	0	0	0	2	0	0	0	0	0	0	1	1	0	0
Caucassica	C8	Original	9	0	0	0	0	1	3	1	0	2	3	3	2	1	3	2	0	3	3	3	3	3	2	0	3	3	0	3	3	0	2	1	3	3	1	3	2	2	0	0	2	0	0	2	1	2	2
Caucassica	C8	Original	10	3	2	0	2	3	3	0	3	1	1	2	2	2	2	3	1	3	2	0	1	3	3	0	0	0	0	3	3	3	3	3	3	3	0	0	0	0	0	2	3	3	0	0	1	3	3
Syriaca	S3	Original	1	0	0	0	0	2	1	0	2	0	2	0	0	0	0	0	0	0	0	0	0	2	3	3	1	0	0	0	0	0	0	0	0	0	0	0	0	0	0	0	0	0	0	0	0	0	0
Syriaca	S3	Original	2	0	0	0	0	0	0	2	1	0	0	3	1	0	0	2	0	0	0	0	0	0	0	0	0	0	0	0	0	0	1	3	3	3	2	0	0	0	0	2	1	0	0	0	0	0	0
Syriaca	S3	Original	3	0	2	3	3	3	3	1	3	1	0	0	0	0	0	0	0	0	0	2	3	3	3	3	3	0	0	0	1	3	3	2	1	0	0	0	0	2	1	0	0	0	1	3	1	0	0
Syriaca	S3	Original	4	3	3	1	0	0	2	3	1	3	3	3	2	3	3	3	3	3	1	3	1	2	3	3	3	3	3	1	3	3	3	0	2	0	0	0	0	2	2	3	0	2	1	1	0	0	0
Syriaca	S3	Original	5	1	2	1	2	0	1	0	0	0	0	0	0	2	0	0	0	0	0	0	1	3	1	1	0	2	1	0	0	3	3	2	0	0	0	0	0	0	0	0	0	1	1	0	0	0	0
Syriaca	S3	Original	6	0	3	0	3	1	0	2	3	0	3	2	0	0	0	0	0	0	0	0	0	0	0	0	0	0	0	0	0	0	0	0	0	0	0	0	0	3	2	1	3	3	0	2	0	3	3
Syriaca	S3	Original	7	0	0	1	3	2	3	2	3	2	3	3	3	3	3	3	3	3	0	0	0	0	0	1	1	3	3	3	1	0	3	1	1	3	1	1	2	0	0	3	0	2	3	3	0	0	3
Syriaca	S3	Original	8	1	1	0	0	0	0	0	0	2	1	1	0	0	0	2	0	0	3	3	3	3	2	1	2	2	0	0	0	0	0	1	0	0	0	0	0	0	0	0	0	0	0	0	0	0	0
Syriaca	S3	Original	9	0	2	3	3	1	3	3	0	2	0	3	3	2	0	2	1	3	3	2	0	0	1	0	0	1	0	2	3	3	3	0	0	2	0	0	0	2	0	0	3	2	0	0	0	2	2
Syriaca	S3	Original	10	3	2	1	3	3	1	0	0	1	3	3	2	2	0	2	0	3	1	0	0	3	1	0	0	0	0	0	3	2	3	3	0	2	1	0	0	0	0	0	0	0	0	0	0	0	0
Caucassica	C2	Original	1	0	3	3	2	3	0	1	3	3	3	0	0	3	3	1	2	2	0	3	3	2	3	2	0	1	3	0	1	1	1	2	1	3	0	1	2	0	2	0	3	0	2	2	1	3	0
Caucassica	C2	Original	2	0	0	0	2	3	3	3	1	0	1	3	2	0	0	2	3	3	3	3	3	3	3	3	0	0	1	0	0	0	1	0	0	0	1	0	0	0	0	0	0	0	1	2	0	0	3
Caucassica	C2	Original	3	1	3	1	0	0	0	3	3	3	3	0	0	0	1	3	3	2	1	3	3	1	0	0	0	0	0	0	0	0	1	3	3	3	3	3	3	2	0	0	0	0	0	2	1	3	3
Caucassica	C2	Original	4	0	0	0	1	1	3	3	3	3	1	0	0	0	1	3	3	3	3	3	3	1	0	0	0	0	0	0	0	0	0	0	0	0	0	3	3	3	0	0	0	3	3	1	0	0	0
Caucassica	C2	Original	5	2	3	3	3	3	3	3	0	0	3	3	3	3	3	2	0	0	0	0	1	3	3	3	3	3	3	3	0	0	0	0	0	0	2	3	3	3	3	0	0	0	0	0	0	1	3
Caucassica	C2	Original	6	0	3	1	0	0	0	0	0	0	0	0	0	0	0	0	2	2	0	0	0	3	3	3	1	0	0	2	0	0	0	0	0	0	0	0	3	3	3	1	0	1	3	1	2	1	3
Caucassica	C2	Original	7	0	0	3	3	3	3	3	2	0	0	1	3	3	0	1	3	3	0	0	3	3	2	0	1	1	0	0	0	0	0	0	3	3	3	2	0	1	1	0	0	0	0	0	0	0	3
Caucassica	C2	Original	8	2	1	0	0	0	3	1	0	0	0	0	2	3	3	3	3	3	3	2	0	0	0	0	0	0	0	0	0	0	0	0	0	0	0	0	0	0	0	2	3	3	2	0	0	0	0
Caucassica	C2	Original	9	3	0	2	3	3	3	2	1	2	0	1	2	0	1	2	0	2	0	0	0	0	1	1	0	0	0	0	1	3	0	0	0	1	3	3	3	3	3	0	0	0	0	0	1	3	3
Caucassica	C2	Original	10	1	3	3	1	0	3	2	0	0	0	0	0	0	0	0	0	2	2	2	2	0	3	2	3	3	1	0	1	2	0	1	3	3	3	1	0	0	0	0	2	2	3	0	0	1	3
Syriaca	S1	Original	1	0	0	0	0	1	2	2	3	3	3	3	0	0	0	3	0	0	0	0	0	0	0	0	0	0	0	0	0	0	0	0	0	0	3	3	3	2	0	0	0	0	3	1	0	0	2
Syriaca	S1	Original	2	2	2	0	0	0	0	0	0	2	0	0	0	0	0	0	0	0	0	0	0	0	0	0	0	0	0	0	0	0	0	0	0	0	0	0	2	0	0	2	0	0	0	0	0	0	0
Syriaca	S1	Original	3	0	0	0	0	0	0	0	0	0	0	2	3	1	0	3	3	3	3	3	3	3	3	3	3	0	0	0	0	0	0	0	0	0	0	0	0	0	0	0	0	0	0	0	0	0	0
Syriaca	S1	Original	4	0	0	2	3	3	0	1	3	1	2	3	3	1	3	3	3	1	1	3	3	3	1	1	2	1	3	3	3	3	3	2	0	0	0	0	3	2	0	2	3	0	2	3	0	3	1
Syriaca	S1	Original	5	0	3	1	0	1	0	1	0	0	2	0	0	0	0	0	0	0	0	0	0	0	0	0	0	0	0	0	0	0	0	0	0	0	0	0	0	3	1	0	0	0	0	0	0	0	0
Syriaca	S1	Original	6	3	3	3	1	3	1	3	3	2	3	1	3	3	3	3	0	0	0	2	0	2	3	3	0	1	3	1	1	2	1	0	0	1	1	0	0	0	0	0	0	0	0	0	0	0	0
Syriaca	S1	Original	7	1	3	1	0	0	0	0	3	3	3	3	3	1	0	2	3	3	1	0	2	2	3	1	0	0	2	3	3	2	3	3	3	0	0	0	0	0	0	0	0	0	0	3	2	0	1
Syriaca	S1	Original	8	0	0	2	3	2	2	0	0	1	3	3	1	0	0	0	0	0	1	3	1	0	0	0	0	1	1	2	0	0	0	0	2	0	0	0	0	0	3	0	0	1	1	0	0	0	0
Syriaca	S1	Original	9	0	0	0	2	3	1	0	0	3	1	0	0	0	2	3	0	0	1	1	0	0	0	0	1	3	1	0	0	0	0	0	0	0	1	1	0	0	0	3	1	0	0	0	0	0	0
Syriaca	S1	Original	10	3	0	2	1	0	0	0	1	1	3	3	3	3	3	3	3	3	3	2	0	3	3	3	3	2	0	3	3	3	3	3	0	3	3	3	3	0	3	1	0	3	3	3	1	0	3
Syriaca	S2	Counterbalance	1	0	0	0	0	3	3	2	2	0	0	0	0	0	0	0	0	1	1	0	0	0	0	0	2	3	3	3	3	0	0	0	0	3	3	1	0	0	1	3	2	0	0	0	0	0	0
Syriaca	S2	Counterbalance	2	0	0	0	0	0	0	0	0	0	0	0	0	0	0	0	0	0	0	0	0	0	0	0	0	0	0	0	0	0	0	0	0	0	0	0	0	0	0	0	0	0	0	0	0	0	0
Syriaca	S2	Counterbalance	3	0	0	3	0	0	1	3	0	0	1	1	0	0	0	0	0	0	0	0	0	0	0	2	0	0	0	0	0	0	0	0	0	0	0	0	2	3	3	3	3	3	3	1	0	0	0
Syriaca	S2	Counterbalance	4	0	0	3	2	0	0	0	0	0	1	3	3	3	0	1	3	1	0	0	0	2	3	3	3	0	0	0	0	0	0	2	3	3	2	0	0	0	3	3	0	0	0	0	0	2	1
Syriaca	S2	Counterbalance	5	3	2	0	0	0	0	0	0	0	0	0	0	0	0	0	0	0	0	0	0	0	0	0	0	0	0	0	0	0	0	0	0	0	0	0	0	0	0	0	0	0	3	0	0	0	0
Syriaca	S2	Counterbalance	6	0	3	3	3	3	3	0	2	3	3	3	3	3	1	3	0	1	3	3	3	3	1	0	3	3	3	2	0	2	2	0	2	3	1	0	3	3	3	1	3	1	3	3	3	3	3
Syriaca	S2	Counterbalance	7	0	0	0	1	3	1	0	0	0	3	1	3	0	0	3	3	3	1	0	2	1	1	2	0	0	0	0	0	0	0	0	0	0	0	0	0	0	0	0	0	0	0	0	0	0	0
Syriaca	S2	Counterbalance	8	0	0	0	0	0	0	0	0	0	0	0	0	0	0	0	0	0	0	0	0	0	0	0	0	0	0	0	0	3	3	3	3	3	3	3	3	3	3	3	3	3	3	3	3	3	3
Syriaca	S2	Counterbalance	9	0	0	0	0	0	0	0	0	0	0	0	0	0	0	1	3	3	3	3	3	3	3	3	3	2	2	0	0	0	0	0	0	0	0	0	0	0	0	0	0	0	0	0	0	0	0
Syriaca	S2	Counterbalance	10	0	0	0	3	2	0	1	3	1	0	3	3	3	2	0	0	0	0	3	2	0	0	0	1	3	1	0	0	0	3	3	3	3	1	3	3	0	1	3	3	1	0	3	3	0	0
Caucassica	C9	Counterbalance	1	3	0	3	3	3	3	1	0	0	0	1	3	3	3	0	0	2	0	0	0	0	0	0	3	3	3	3	0	2	3	0	1	2	0	0	0	0	0	0	0	0	0	0	0	0	2
Caucassica	C9	Counterbalance	2	0	0	0	0	0	0	1	2	1	0	1	1	0	0	0	0	0	0	0	0	0	0	0	0	0	0	0	0	0	0	0	0	0	0	0	0	0	0	0	0	0	0	0	0	0	0
Caucassica	C9	Counterbalance	3	0	2	1	3	3	0	2	0	0	0	0	0	0	0	0	0	0	0	0	0	0	0	0	0	0	0	0	0	0	0	0	0	0	0	0	2	0	0	0	2	3	3	3	2	0	2
Caucassica	C9	Counterbalance	4	0	0	0	0	0	0	0	0	0	0	0	0	1	2	0	0	0	0	0	0	0	0	0	0	0	0	0	0	0	0	0	0	0	0	0	0	3	3	3	3	3	3	3	3	3	3
Caucassica	C9	Counterbalance	5	2	2	2	2	1	2	3	3	1	0	0	0	0	0	0	0	0	0	0	0	0	0	0	0	0	3	1	0	0	0	0	0	1	3	3	3	3	3	3	3	3	3	3	3	3	3
Caucassica	C9	Counterbalance	6	3	3	3	3	3	3	3	3	3	3	3	3	3	3	3	3	1	1	2	1	1	0	2	3	1	2	2	1	3	1	2	2	2	0	0	0	0	3	1	1	0	0	0	0	0	0
Caucassica	C9	Counterbalance	7	2	0	0	0	0	0	0	0	0	0	0	0	0	0	0	0	0	2	3	3	3	1	1	3	3	3	0	0	0	0	0	2	3	3	1	0	3	3	3	3	3	2	0	2	3	3
Caucassica	C9	Counterbalance	8	3	2	3	0	3	3	3	3	3	3	3	3	3	3	3	3	3	3	3	3	3	3	3	3	3	3	3	3	3	3	3	3	3	3	3	3	3	3	3	3	3	3	3	3	3	3
Caucassica	C9	Counterbalance	9	3	3	3	1	1	2	0	0	0	1	3	3	3	3	1	0	0	0	0	0	0	0	0	0	0	0	0	0	0	0	0	0	0	0	0	0	0	0	2	3	3	3	2	0	0	0
Caucassica	C9	Counterbalance	10	2	2	2	0	3	0	3	3	0	1	3	2	0	0	0	0	0	2	3	3	3	3	0	0	0	0	0	0	0	0	0	0	0	0	0	2	3	3	3	3	3	3	3	0	3	3
Caucassica	C9	Counterbalance	11	0	0	0	0	0	0	0	1	1	0	3	1	0	0	1	1	0	0	0	3	3	3	3	3	3	3	3	3	2	0	0	0	0	1	3	3	3	3	3	3	3	3	3	3	3	3
Caucassica	C8	Counterbalance	1	1	0	0	0	0	0	1	2	0	0	0	0	0	0	0	0	0	0	0	0	0	0	0	0	0	0	0	0	0	0	0	0	0	0	0	0	0	1	1	0	0	0	0	0	0	0
Caucassica	C8	Counterbalance	2	3	0	0	0	0	0	0	0	0	0	0	0	0	0	0	2	3	3	3	3	3	3	3	3	3	0	0	0	0	0	0	0	0	0	0	0	0	3	3	1	0	0	2	3	3	3
Caucassica	C8	Counterbalance	3	1	2	0	0	0	0	0	0	2	1	0	0	0	0	0	0	0	0	0	0	0	0	0	0	0	0	0	0	0	0	0	0	0	0	0	0	0	0	0	0	0	0	0	0	0	0
Caucassica	C8	Counterbalance	4	1	0	0	2	3	3	1	1	3	2	0	0	0	3	3	0	3	3	0	0	0	0	1	3	3	2	0	0	1	2	0	0	0	0	0	0	0	0	0	0	0	0	0	0	0	0
Caucassica	C8	Counterbalance	5	1	2	3	3	0	1	3	3	0	0	0	0	0	3	3	3	3	1	1	3	3	1	0	0	2	3	1	0	2	3	1	0	0	3	3	3	1	0	0	3	0	0	0	0	0	0
Caucassica	C8	Counterbalance	6	1	2	1	1	3	3	2	0	0	0	0	0	0	0	0	0	0	0	0	0	0	0	0	0	0	0	0	0	0	0	0	0	0	0	0	2	0	0	0	0	0	0	0	0	0	0
Caucassica	C8	Counterbalance	7	1	3	3	3	0	1	2	0	0	1	2	0	0	0	0	0	0	0	0	0	0	0	0	0	0	0	0	0	0	0	0	0	0	2	3	2	0	0	0	0	0	0	0	0	3	3
Caucassica	C8	Counterbalance	8	3	0	0	0	0	3	2	0	0	0	0	0	1	1	0	2	2	0	0	0	0	3	1	0	2	3	0	0	0	0	0	0	0	0	0	0	0	2	0	2	1	2	0	0	0	0
Caucassica	C8	Counterbalance	9	2	0	0	2	3	0	0	1	3	0	1	3	0	0	0	0	0	0	0	0	0	0	2	3	1	0	1	3	1	0	2	3	0	0	0	0	0	2	2	0	1	3	1	0	0	0
Caucassica	C8	Counterbalance	10	3	3	3	3	3	1	0	0	0	0	0	0	0	2	0	2	0	3	3	3	3	1	0	1	1	2	0	0	0	0	0	3	3	3	3	3	1	1	3	3	0	0	0	0	0	0
Syriaca	S3	Counterbalance	1	1	0	2	1	0	3	0	0	0	0	0	0	0	2	0	2	3	0	2	3	1	3	2	3	1	0	3	3	3	3	3	3	3	3	3	3	1	0	3	3	3	3	3	3	3	3
Syriaca	S3	Counterbalance	2	2	0	0	0	0	0	0	0	0	0	0	0	0	0	0	0	0	0	0	0	0	0	0	0	0	0	0	0	0	0	0	0	0	1	1	0	3	1	3	0	0	0	0	0	0	0
Syriaca	S3	Counterbalance	3	1	0	0	3	1	0	0	0	0	0	0	0	0	0	2	3	2	0	0	0	0	0	0	0	0	0	0	0	0	0	0	1	3	3	3	3	0	3	2	0	0	0	0	0	0	0
Syriaca	S3	Counterbalance	4	3	2	0	2	2	3	3	1	0	3	3	3	3	3	3	2	0	2	2	1	1	2	1	0	0	0	0	2	2	0	0	0	2	2	0	1	1	0	0	0	0	0	2	3	1	0
Syriaca	S3	Counterbalance	5	1	0	1	3	2	0	0	0	0	2	3	0	3	3	2	3	3	2	0	0	0	0	0	0	0	0	0	0	0	0	1	2	0	3	0	0	0	0	0	0	0	0	0	0	0	0
Syriaca	S3	Counterbalance	6	3	3	3	0	1	3	3	1	2	2	0	3	3	2	0	2	3	0	3	3	1	2	3	2	1	1	1	2	0	2	3	1	1	3	1	2	3	3	1	2	3	3	3	3	0	1
Syriaca	S3	Counterbalance	7	1	0	0	0	0	0	0	0	0	0	3	3	1	0	0	2	2	0	0	0	0	0	0	0	0	0	0	0	0	0	0	0	0	0	0	0	0	0	0	0	0	0	0	0	0	0
Syriaca	S3	Counterbalance	8	3	2	0	0	0	0	0	0	0	0	2	0	0	0	2	3	3	2	1	3	2	3	3	1	3	3	0	2	2	0	3	1	0	1	3	1	2	1	2	1	0	1	3	1	3	2
Syriaca	S3	Counterbalance	9	3	0	0	3	3	0	0	0	2	0	3	3	1	0	0	0	0	3	3	3	0	0	0	2	2	2	0	0	0	0	0	2	3	0	0	0	0	0	0	0	0	0	0	0	0	0
Syriaca	S3	Counterbalance	10	3	2	0	0	0	3	3	2	0	0	3	1	0	0	2	1	0	0	0	0	0	0	0	0	0	0	0	0	2	0	0	0	1	0	3	0	1	2	3	3	0	2	1	0	2	0
Caucassica	C2	Counterbalance	1	3	2	1	9	18	0	3	2	0	0	0	0	0	0	0	0	0	1	2	0	0	0	0	0	0	0	0	0	3	0	0	0	0	0	0	0	0	0	0	0	0	0	0	0	0	0
Caucassica	C2	Counterbalance	2	1	0	0	0	0	0	0	1	1	0	0	0	2	0	0	3	0	0	0	0	0	0	0	0	0	0	0	0	0	0	0	0	0	0	0	0	0	0	0	0	0	0	0	0	0	0
Caucassica	C2	Counterbalance	3	3	2	1	3	0	0	0	0	0	0	2	2	0	0	0	0	0	0	0	0	0	0	0	0	0	0	0	0	0	0	0	0	0	0	0	2	1	0	0	0	0	0	0	0	0	0
Caucassica	C2	Counterbalance	4	1	1	2	1	2	0	0	1	0	1	1	1	2	0	0	3	0	0	2	3	1	2	0	0	0	0	0	0	1	1	0	0	0	0	0	0	0	0	0	1	1	0	0	1	0	0
Caucassica	C2	Counterbalance	5	1	2	0	2	2	0	0	1	0	0	0	0	0	0	0	0	0	0	0	0	0	0	0	0	0	0	0	0	0	0	0	0	0	0	0	0	0	0	0	0	0	0	0	0	0	0
Caucassica	C2	Counterbalance	6	1	0	0	1	1	1	0	0	1	0	0	1	1	0	0	1	1	0	2	0	2	1	3	1	2	3	1	0	2	3	3	3	1	0	0	0	0	1	1	0	2	1	0	0	0	1
Caucassica	C2	Counterbalance	7	3	1	0	0	0	2	3	3	3	3	3	3	3	3	3	1	0	0	3	1	0	3	3	0	0	0	0	0	0	0	0	0	0	0	0	0	3	3	3	3	3	3	3	3	3	3
Caucassica	C2	Counterbalance	8	2	1	3	3	3	3	2	1	3	1	3	1	0	0	0	2	3	3	3	2	3	0	0	1	3	3	3	1	0	2	3	3	3	2	0	1	3	2	0	0	0	0	0	0	0	1
Caucassica	C2	Counterbalance	9	2	1	1	0	3	3	0	0	0	0	0	0	0	0	0	0	0	0	1	3	0	0	0	0	0	0	3	1	0	0	0	0	1	3	1	0	1	2	0	1	1	0	0	1	3	0
Caucassica	C2	Counterbalance	10	2	3	0	1	3	0	0	0	2	1	3	0	0	0	0	0	0	0	0	0	0	0	0	0	0	0	0	0	0	0	0	0	1	3	1	0	0	0	0	0	0	0	0	0	0	0
Syriaca	S1	Counterbalance	1	2	0	0	0	0	0	0	3	1	0	0	0	2	0	0	0	0	0	0	0	0	0	0	0	0	0	0	0	0	0	0	0	0	0	0	0	0	0	0	0	0	0	0	0	0	0
Syriaca	S1	Counterbalance	1	0	0	0	0	0	0	0	0	0	0	0	0	0	0	0	0	0	0	0	0	0	0	0	0	0	0	0	0	0	1	3	3	3	2	0	0	0	3	0	0	0	0	0	0	0	0
Syriaca	S1	Counterbalance	3	1	0	2	0	0	0	0	0	0	0	0	0	0	0	0	0	0	0	0	0	0	0	0	0	0	0	0	0	0	0	0	0	0	0	0	0	0	0	0	0	0	0	0	0	0	0
Syriaca	S1	Counterbalance	3	3	1	2	3	3	3	3	3	3	1	1	3	3	3	1	0	3	3	3	3	3	3	3	3	3	3	3	3	3	2	0	3	3	1	1	3	3	1	3	3	3	3	3	3	0	3
Syriaca	S1	Counterbalance	2	3	2	0	2	3	2	0	2	3	3	3	3	3	3	3	3	0	1	3	1	2	1	0	3	2	0	3	1	0	3	0	0	2	0	0	0	0	3	3	3	3	3	3	3	3	3
Syriaca	S1	Counterbalance	1	0	0	0	0	2	2	0	0	0	0	0	0	0	0	0	0	3	1	0	0	0	0	0	0	0	0	0	0	0	0	0	0	0	0	0	0	0	0	0	0	0	0	0	0	0	0
Syriaca	S1	Counterbalance	3	2	3	2	2	1	1	0	2	0	0	3	3	1	2	1	0	2	2	1	3	2	0	0	0	0	0	0	0	0	2	0	0	0	0	0	0	3	2	0	0	0	0	1	3	0	1
Syriaca	S1	Counterbalance	1	3	1	3	3	1	0	3	1	3	1	1	3	0	2	3	0	3	1	1	3	1	1	3	2	2	1	2	0	3	2	0	3	3	0	2	1	3	0	3	3	1	3	0	0	1	3
Syriaca	S1	Counterbalance	3	3	1	2	1	3	0	3	1	1	3	0	2	2	3	0	3	3	1	2	0	0	0	2	0	1	0	0	1	3	2	0	1	1	2	0	0	0	1	2	0	0	0	0	0	0	2
Syriaca	S1	Counterbalance	3	2	0	2	1	0	0	1	2	1	2	0	3	3	1	3	1	2	3	3	2	2	3	0	0	3	3	1	0	2	3	1	2	1	0	2	3	2	0	3	3	3	0	0	0	0	0
[truncated: 154 more columns]
